# Supplementary material for: Synthesis and Characterisation of Platinum(II) Diaminocyclohexane Complexes with Pyridine Derivatives as Anticancer Agents
Source: MDPI journal article supplement (doi:10.3390/ijms242417150), 2023-12-05
Supplement: s1 [file s1]

# Synthesis and Characterisation of Platinum(II) Diaminocyclohexane Complexes with Pyridine Derivatives as Anticancer Agents

Brondwyn S. McGhie,<sup>a</sup> Jennette Sakoff,<sup>b</sup> Jayne Gilbert,<sup>b</sup> Christopher P. Gordon<sup>a</sup> and Janice R. Aldrich-Wright<sup>a\*</sup>

<sup>a</sup> School of Science, Nanoscale Organisation and Dynamics Group, Western Sydney University, Locked Bag 1797 Penrith South DC, 2751, NSW, Australia

<sup>b</sup> Calvary Mater Newcastle, Waratah, NSW 2298, Australia

\*Corresponding author – Email. J.Aldrich-Wright@westernsydney.edu.au, Ph. +61246203218

## Supplementary Data

|                                                                                                                                   |    |
|-----------------------------------------------------------------------------------------------------------------------------------|----|
| <b>Synthesis and Characterisation of Pt(II) Diaminocyclohexane Complexes with Pyridine Derivatives as anticancer agents</b> ..... | 1  |
| <b>Characterisation</b> .....                                                                                                     | 3  |
| NMR .....                                                                                                                         | 3  |
| [Pt(PyPy)(Cl) <sub>2</sub> ].....                                                                                                 | 5  |
| [Pt(ImPy)(Cl) <sub>2</sub> ] .....                                                                                                | 6  |
| [Pt(BImPy)(Cl) <sub>2</sub> ] .....                                                                                               | 8  |
| [Pt(PyPy)(SSDACH)] <sup>2+</sup> .....                                                                                            | 9  |
| [Pt(PyPy)(RRDACH)] <sup>2+</sup> .....                                                                                            | 11 |
| [Pt(ImPy)(SSDACH)] <sup>2+</sup> .....                                                                                            | 12 |
| [Pt(ImPy)(RRDACH)] <sup>2+</sup> .....                                                                                            | 14 |
| [Pt(BImPy)(SSDACH)] <sup>2+</sup> .....                                                                                           | 15 |
| [Pt(BImPy)(RRDACH)] <sup>2+</sup> .....                                                                                           | 17 |
| Molar Absorption Coefficients.....                                                                                                | 19 |
| [Pt(PyPy)(SSDACH)] <sup>2+</sup> .....                                                                                            | 19 |
| [Pt(PyPy)(RRDACH)] <sup>2+</sup> .....                                                                                            | 19 |
| [Pt(ImPy)(SSDACH)] <sup>2+</sup> .....                                                                                            | 20 |
| [Pt(ImPy)(RRDACH)] <sup>2+</sup> .....                                                                                            | 20 |
| [Pt(BImPy)(SSDACH)] <sup>2+</sup> .....                                                                                           | 21 |
| [Pt(BImPy)(RRDACH)] <sup>2+</sup> .....                                                                                           | 21 |
| HPLC .....                                                                                                                        | 22 |
| [Pt(PyPy)(SSDACH)] <sup>2+</sup> .....                                                                                            | 22 |
| [Pt(ImPy)(SSDACH)] <sup>2+</sup> .....                                                                                            | 22 |
| [Pt(BImPy)(SSDACH)] <sup>2+</sup> .....                                                                                           | 22 |
| [Pt(PyPy)(RRDACH)] <sup>2+</sup> .....                                                                                            | 23 |
| [Pt(ImPy)(RRDACH)] <sup>2+</sup> .....                                                                                            | 23 |

|                                         |    |
|-----------------------------------------|----|
| [Pt(BImPy)(RRDACH)] <sup>2+</sup> ..... | 23 |
| CD .....                                | 24 |
| [Pt(PyPy)(SSDACH)] <sup>2+</sup> .....  | 24 |
| [Pt(ImPy)(SSDACH)] <sup>2+</sup> .....  | 25 |
| [Pt(BImPy)(SSDACH)] <sup>2+</sup> ..... | 26 |
| ESI MS .....                            | 27 |
| [Pt(PyPy)(SSDACH)] <sup>2+</sup> .....  | 27 |
| [Pt(PyPy)(RRDACH)] <sup>2+</sup> .....  | 28 |
| [Pt(ImPy)(SSDACH)] <sup>2+</sup> .....  | 29 |
| [Pt(ImPy)(RRDACH)] <sup>2+</sup> .....  | 30 |
| [Pt(BImPy)(SSDACH)] <sup>2+</sup> ..... | 31 |
| [Pt(BImPy)(RRDACH)] <sup>2+</sup> ..... | 32 |
| Lipophilicity .....                     | 33 |
| GI <sub>50</sub> .....                  | 34 |
| References .....                        | 35 |

## Characterisation

### NMR

NMR Spectral data were obtained using a 400 MHz Bruker Avance spectrometer at 298 K, using 10 mm samples prepared in DMSO.  $^1\text{H}$  NMR spectra were obtained using a spectral width of 8250 Hz and 65536 data points, while  $^{195}\text{Pt}$  NMR spectra were acquired using a spectral width of 85470 Hz and 674 data points.  $^1\text{H}$ - $^{195}\text{Pt}$  HMQC spectra were recorded using a spectral width of 214436 Hz and 256 data points for the  $^{195}\text{Pt}$  nucleus (F1 dimension) and a spectral width of 4808 Hz with 2048 data points for the  $^1\text{H}$  nucleus (F2 dimension). Chemical shifts are reported in parts per million (ppm) with J coupling reported in Hz.

To assign each peak they were first integrated and assessed as either a doublet (d, triplet (t), doublet of doublets (dd) or a multiplet (m). Then the location and J coupling of the peaks was assessed to determine the assignment of each peak if further queries of identity arose the COSY and HMQC spectra could be utilised to distinguish between close peaks or assess which protons made up merged peaks. All proton assignments are summarised in the table below.

**Table S1:** Proton assignment, and J coupling for complexes **1-6** and the <sup>195</sup>Pt value.

| Proton            | Complex                                |                            |                            |                                  |                                  |                                      |                                 |                                      |                                      |
|-------------------|----------------------------------------|----------------------------|----------------------------|----------------------------------|----------------------------------|--------------------------------------|---------------------------------|--------------------------------------|--------------------------------------|
|                   | 1                                      | 2                          | 3                          | 4a                               | 4b                               | 5a                                   | 5b                              | 6a                                   | 6b                                   |
| 1                 | δ 9.15(d, J= 5.85 Hz, H1)              | δ 9.28(d, J= 5.74 Hz, H1)  | δ 9.49 (d, J= 6.03 Hz, H1) | δ 9.81(d, J= 5.74 Hz, H1)        | δ 8.47(d, J= 5.78 Hz, H1)        | δ 8.70d, J= 5.73 Hz, H1)             | δ 8.18d, J= 5.69Hz, H1)         | δ 8.67(d, J= 5.57 Hz, H1)            | δ 8.66(d, J= 5.57 Hz, H1)            |
| 2                 | δ 7.49(t, J= 6.88 Hz, H1)              | δ 7.81(m, H1)              | δ 7.80(merged with 12, H2) | δ 8.69(t, J= 6.76 Hz, H1)        | δ 7.36(t, J= 6.91 Hz, H1)        | δ 7.64(t, J= 6.54 Hz, H1)            | δ 7.28(t, J= 6.63 Hz, H1)       | δ 7.18(m, H1)                        | δ 7.19(m, H1)                        |
| 3                 | δ 8.16(t, J= 7.78 Hz, H1)              | δ 8.34(t, J= 7.75 Hz, H1)  | δ 8.45(t, J= 7.58 Hz, H1)  | δ 9.45(t, J= 7.70 Hz, H1)        | δ 8.12(t, J= 7.76 Hz, H1)        | δ 8.35(t, J= 7.67 Hz, H1)            | δ 8.04(t, J= 7.93 Hz, H1)       | δ 8.35(t, J= 7.88 Hz, H1)            | δ 8.32(t, J= 7.78 Hz, H1)            |
| 4                 | δ 7.59 (d, J= 7.93 Hz, H1)             | δ 8.15 (d, J= 8.15 Hz, H1) | δ 8.81 (d, J= 8.22 Hz, H1) | δ 9.14(d, J= 8.07 Hz, H1)        | δ 7.81d, J= 8.13 Hz, H1)         | δ 7.40(d, J= 7.90 Hz, H1)            | δ 7.76(d, J= 7.90 Hz, H1)       | δ 8.30d, J= 7.39 Hz, H1)             | δ 8.32d, J= 7.40 Hz, H1)             |
| 6                 | δ 4.60(dd, J= 15.24, 7.71 Hz, H1)      |                            |                            | δ 8.67(merged, J = 10.17 Hz, H3) | δ 7.13(merged, J = 9.88 Hz, H3)  |                                      |                                 |                                      |                                      |
| 7                 | δ 2.47 (m, H merged with solvent peak) |                            |                            |                                  |                                  |                                      |                                 |                                      |                                      |
| 8                 | δ 1.86 (m, H2)                         | δ 7.37 (m, H2)             |                            | δ 7.44, 7.30(t, J= 9.46 Hz, H2)  | δ 6.12, 5.96(t, J= 10.41 Hz, H2) | δ 6.03 (d, J= 10.20 Hz, H1)          | δ 7.25 (d, J= 0.40 Hz, H2=1)    |                                      |                                      |
| 9                 | δ 3.09 (m, H2)                         | δ 7.68 (m, H2)             | δ 8.31 (d, J= 7.73 Hz, H1) | δ 8.14, 8.03 (d, J= 8.45 Hz, H2) | δ 6.81, 6.69 (d, J= 7.48 Hz, H2) | δ 7.15, 7.05 (d, J= 7.65 Hz, H1)     | δ 7.03(d, J= 0.25 Hz, H1)       | δ 7.37 (d, J= 7.98 Hz, H1)           | δ 7.37 (d, J= 7.92 Hz, H1)           |
| 10                |                                        |                            | δ 7.44(t, J= 7.85 Hz, H1)  |                                  |                                  |                                      |                                 | δ 7.08, 6.90(m, H2)                  | δ 7.08, 6.82(m, H1)                  |
| 11                |                                        |                            | δ 7.52(t, J= 7.19 Hz, H1)  |                                  |                                  |                                      |                                 | δ 6.61, 6.11 (m, H1)                 | δ 6.61, 6.11 (m, H1)                 |
| 12                |                                        |                            | δ 7.80(merged with 2, H2)  |                                  |                                  |                                      |                                 | δ 7.65 (d, J= 7.83 Hz, H1)           | δ 7.65 (d, J= 7.68 Hz, H1)           |
| 1',2'             |                                        |                            |                            | δ 4.26 (m, H2)                   | δ 2.93 (m, H2)                   | δ 3.20 (m, merged with solvent peak) | δ 2.95 (m, H2)                  | δ 2.40 (m, merged with solvent peak) | δ 2.42 (m, merged with solvent peak) |
| 1',2'             |                                        |                            |                            | δ 3.71 (m, H2)                   | δ 2.36 (m, H2)                   | δ 2.40 (m, merged with solvent peak) | δ 2.49 (m, H2)                  | δ 2.12 (m, H2)                       | δ 2.11 (m, H2)                       |
| 3',6'             |                                        |                            |                            | δ 3.56 (m, H2)                   | δ 2.02 (m, H2)                   | δ 2.06 (m, H2)                       | δ 2.05 (m, H2)                  | δ 2.02 (m, H2)                       | δ 2.02 (m, H2)                       |
| 3',6'             |                                        |                            |                            | δ 2.72 (m, H2)                   | δ 1.38(m, H2)                    | δ 1.43(m, H2)                        | δ 1.34(m, H4 merged with 3'/6') | δ 1.46 (m, H2)                       | δ 1.46 (m, H2)                       |
| 4',5'             |                                        |                            |                            | δ 2.96 (m, H2)                   | δ 1.62 (m, H2)                   | δ 1.58 (m, H2)                       | δ 1.64 (m, H2)                  | δ 1.60 (m, H2)                       | δ 1.61 (m, H2)                       |
| 4',5'             |                                        |                            |                            | δ 2.49(m, H2)                    | δ 1.16(m, H2)                    | δ 1.15(m, H2)                        | δ 1.18(m, H4 merged with 3'/6') | δ 1.18 (m, H2)                       | δ 1.18 (m, H2)                       |
| <sup>195</sup> Pt | -3115.8                                | -3150.1                    | -2217.4                    | -2898.1                          | -2900.8                          | -2896.0                              | -2900.8                         | -2848.1                              | -2850.1                              |

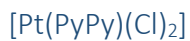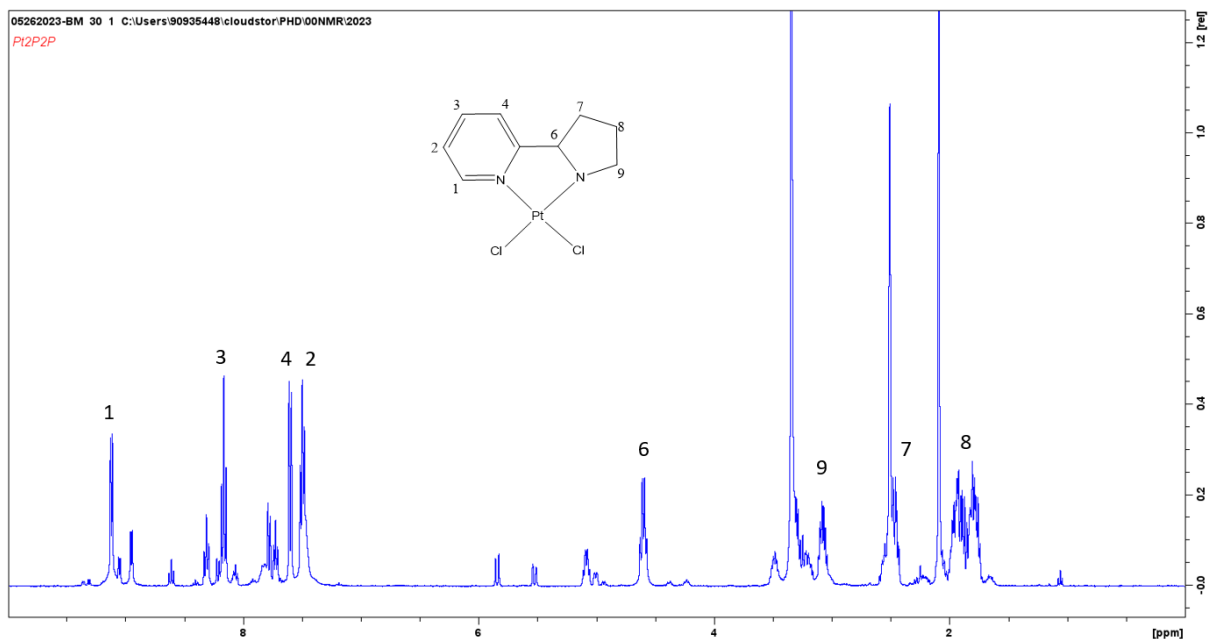

**Figure S1:**  $^1\text{H}$  NMR spectra of  $1[\text{Pt}(\text{PyPy})(\text{Cl})_2]^{2+}$  in DMSO, spectral width of 8250 Hz and 65536 data points.

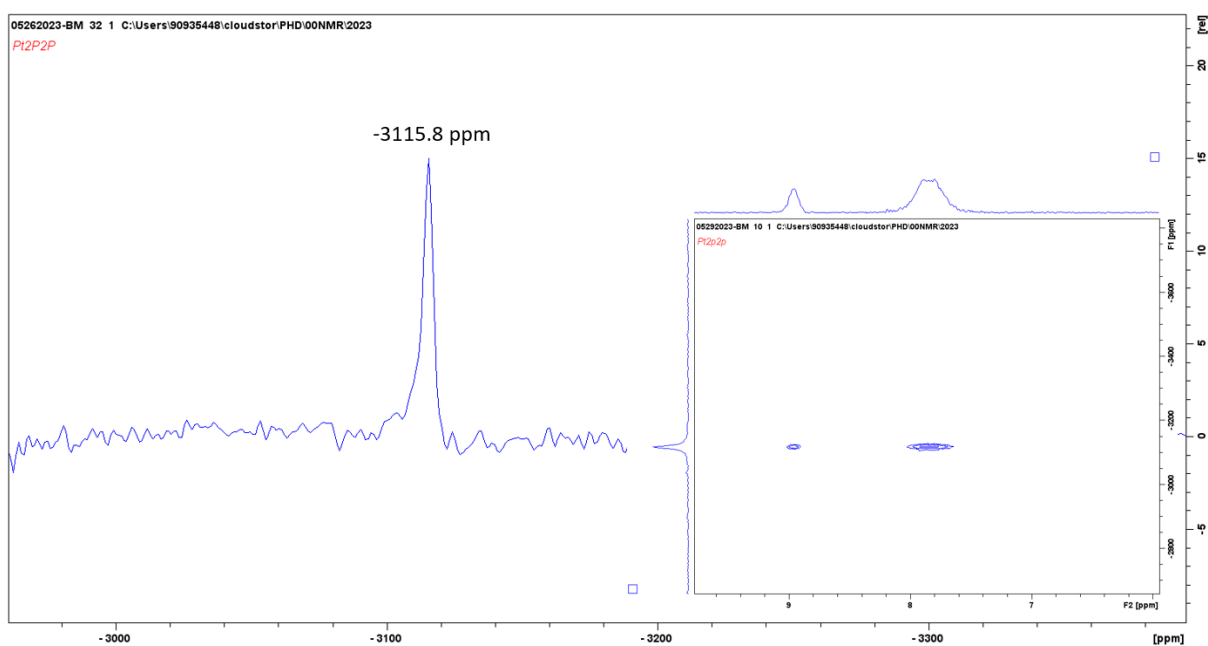

**Figure S2:**  $^{195}\text{Pt}$  peak spectra of  $1[\text{Pt}(\text{PyPy})(\text{Cl})_2]^{2+}$  in DMSO, spectral width of 214436 Hz and 256 data points for the  $^{195}\text{Pt}$  nucleus (F1 dimension) and a spectral width of 4808 Hz with 2048 data points for the  $^1\text{H}$  nucleus (F2 dimension).

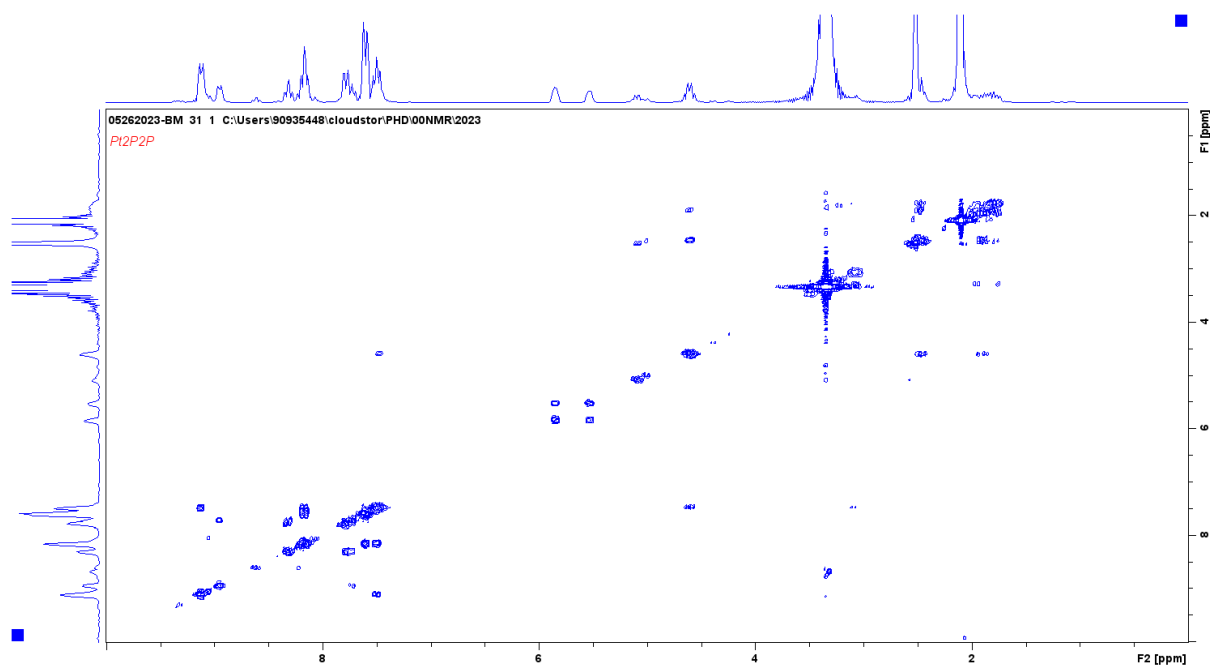

**Figure S3:**  $^1\text{H}/^1\text{H}$  COSY spectra of **1**  $[\text{Pt}(\text{PyPy})(\text{Cl})_2]^{2+}$  in DMSO, F1/F2  $^1\text{H}$  dimension spectral width of 8250 Hz and 65536 data points

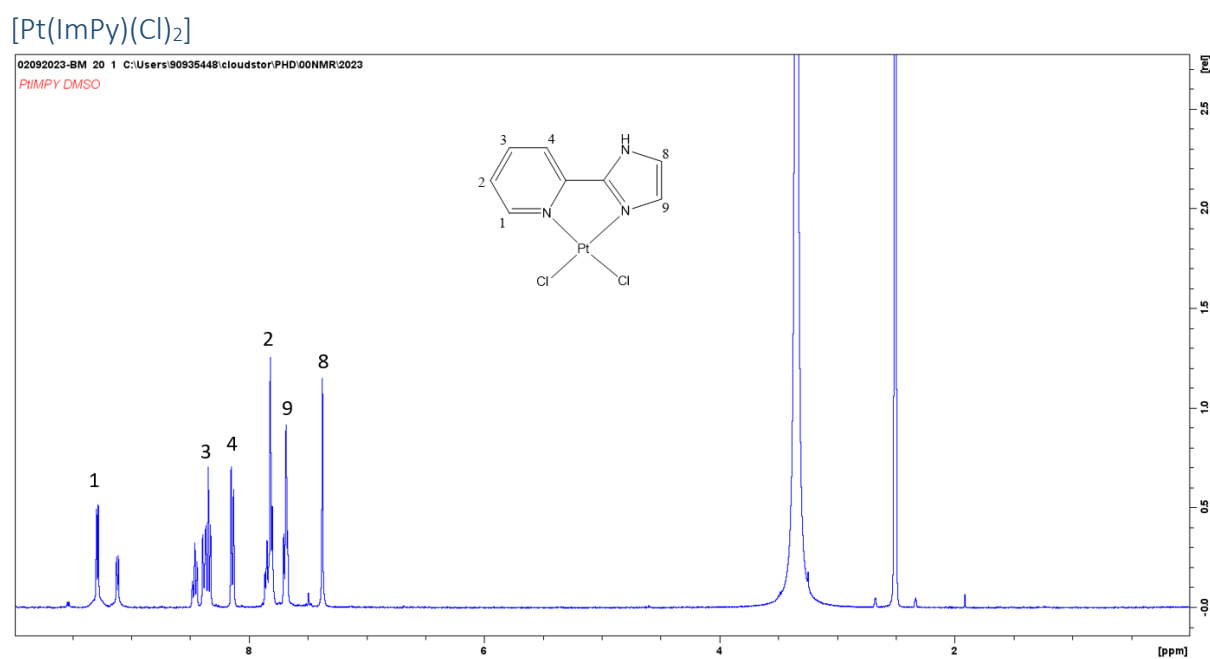

**Figure S4:**  $^1\text{H}$  NMR spectra of **2**  $[\text{Pt}(\text{ImPy})(\text{Cl})_2]^{2+}$  in DMSO, spectral width of 8250 Hz and 65536 data points.

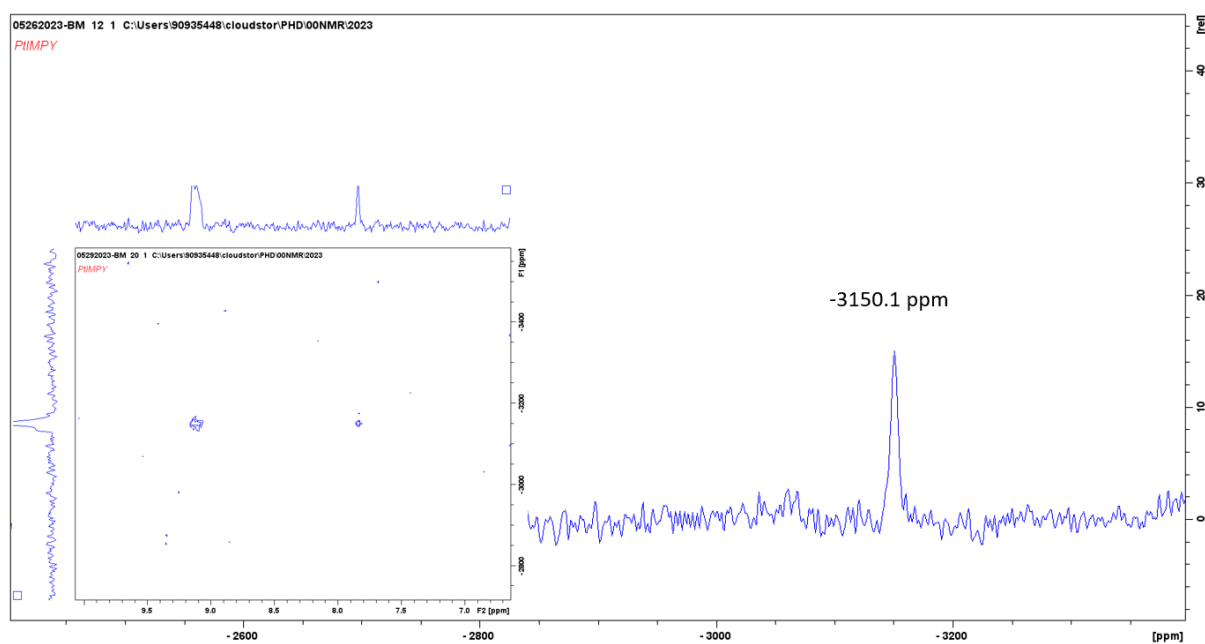

**Figure S5:**  $^{195}\text{Pt}$  peak spectra of  $2 [\text{Pt}(\text{ImPy})(\text{Cl})_2]^{2+}$  in DMSO, spectral width of 214436 Hz and 256 data points for the  $^{195}\text{Pt}$  nucleus (F1 dimension) and a spectral width of 4808 Hz with 2048 data points for the  $^1\text{H}$  nucleus (F2 dimension).

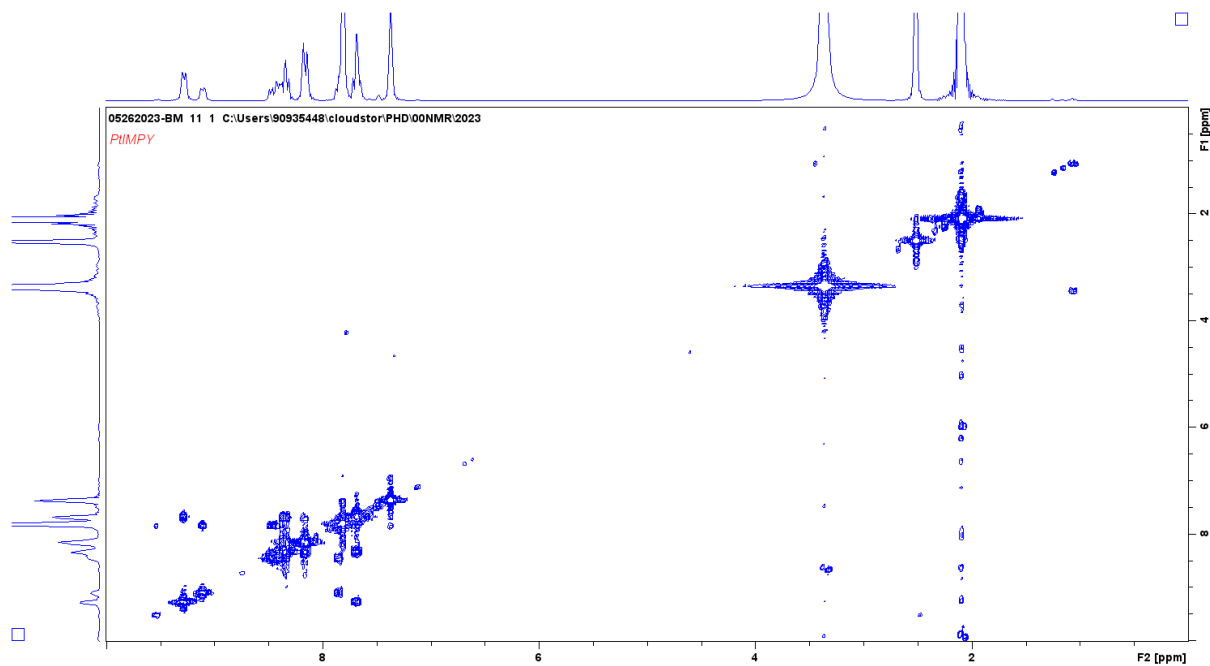

**Figure S6:**  $^1\text{H}/^1\text{H}$  COSY spectra of  $2 [\text{Pt}(\text{ImPy})(\text{Cl})_2]^{2+}$  in DMSO, F1/F2  $^1\text{H}$  dimension spectral width of 8250 Hz and 65536 data points.

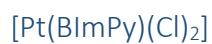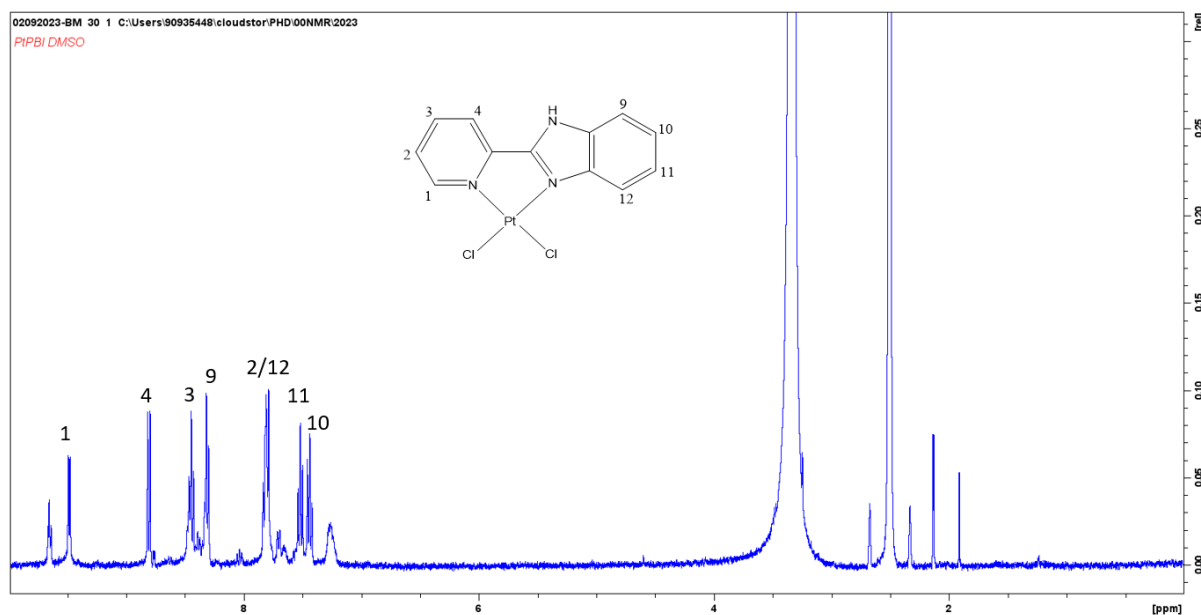

**Figure S7:** <sup>1</sup>H NMR spectra of 3 [Pt(BImPy)(Cl)<sub>2</sub>]<sup>2+</sup> in DMSO, spectral width of 8250 Hz and 65536 data points.

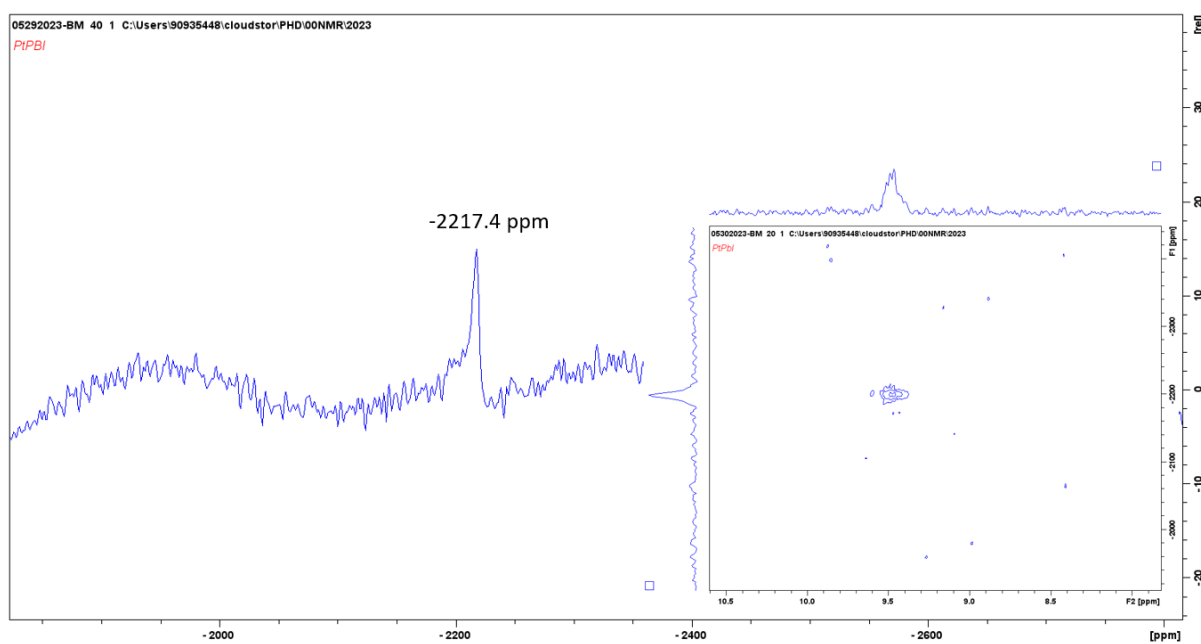

**Figure S8:** <sup>195</sup>Pt peak spectra of 3 [Pt(BImPy)(Cl)<sub>2</sub>]<sup>2+</sup> in DMSO, spectral width of 214436 Hz and 256 data points for the <sup>195</sup>Pt nucleus (F1 dimension) and a spectral width of 4808 Hz with 2048 data points for the <sup>1</sup>H nucleus (F2 dimension).



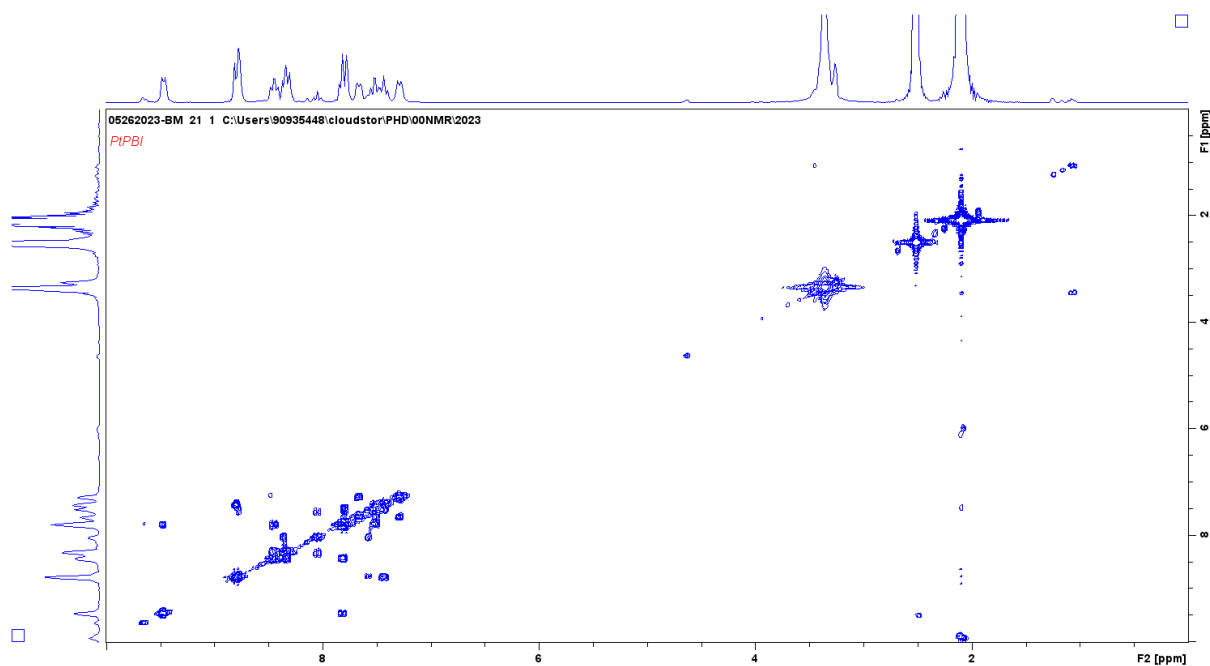

**Figure S9:**  $^1\text{H}/^1\text{H}$  COSY spectra of **3**  $[\text{Pt}(\text{BImPy})(\text{Cl})_2]^{2+}$  in DMSO, F1/F2  $^1\text{H}$  dimension spectral width of 8250 Hz and 65536 data points.

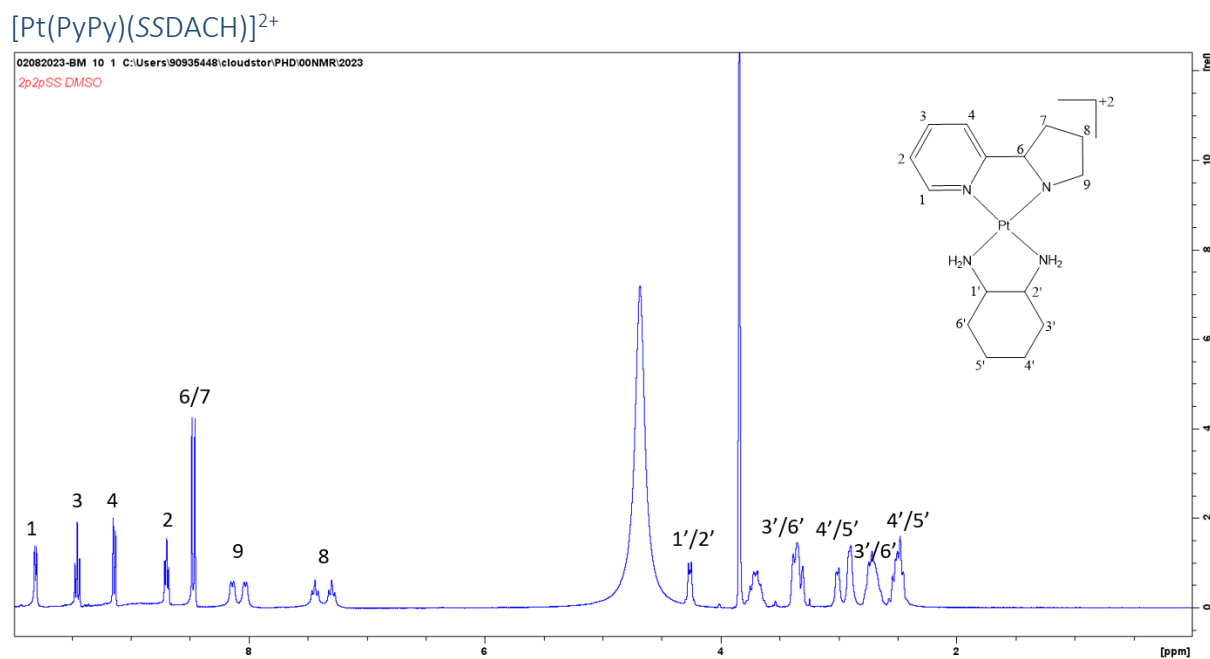

**Figure S10:**  $^1\text{H}$  NMR spectra of **4a**  $[\text{Pt}(\text{PyPy})(\text{SSDACH})]^{2+}$  in DMSO, spectral width of 8250 Hz and 65536 data points.

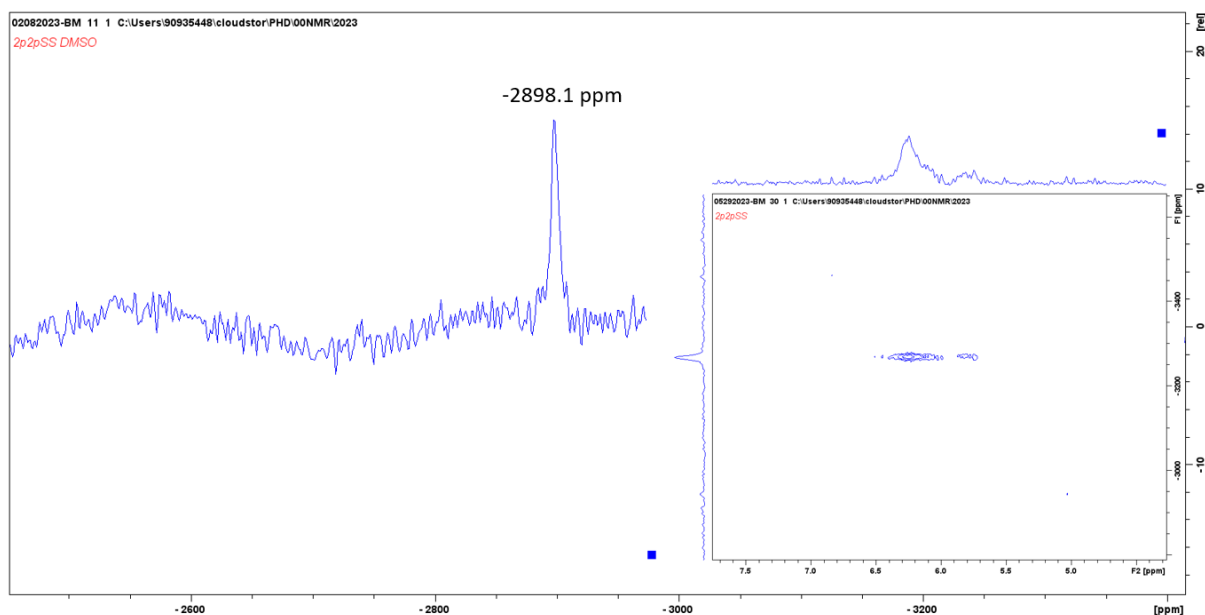

**Figure S11:**  $^{195}\text{Pt}$  peak spectra of 4a  $[\text{Pt}(\text{PyPy})(\text{SSDACH})]^{2+}$  in DMSO, spectral width of 214436 Hz and 256 data points for the  $^{195}\text{Pt}$  nucleus (F1 dimension) and a spectral width of 4808 Hz with 2048 data points for the  $^1\text{H}$  nucleus (F2 dimension).

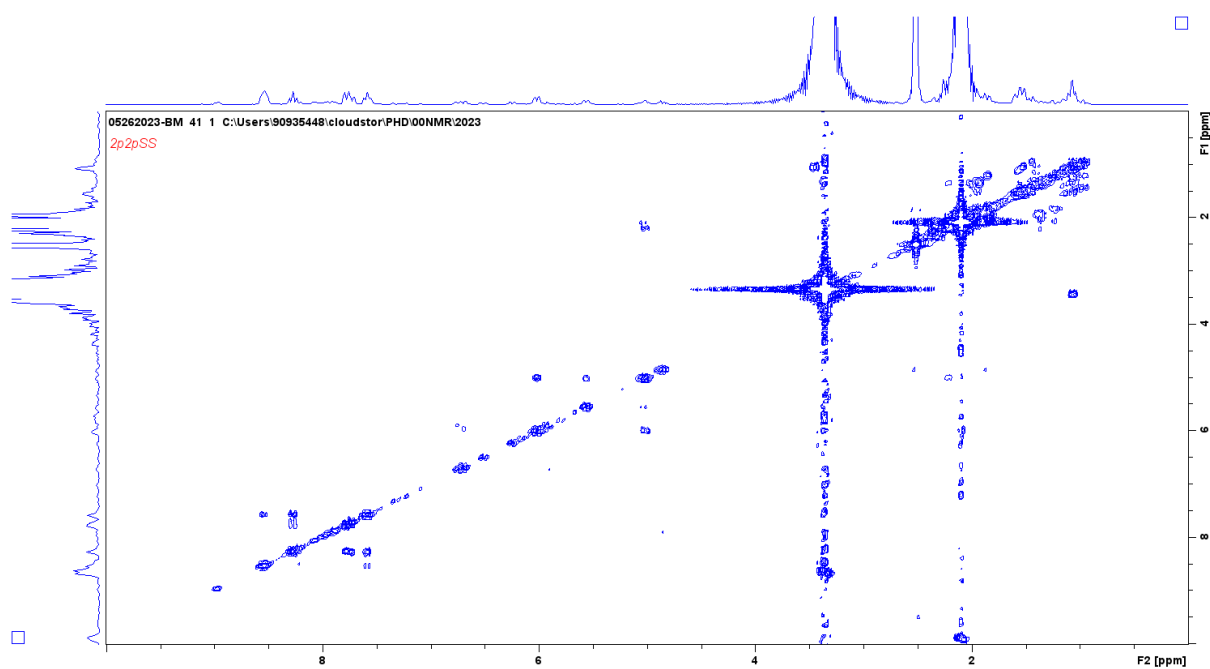

**Figure S12:**  $^1\text{H}/^1\text{H}$  COSY spectra of 4a  $[\text{Pt}(\text{PyPy})(\text{SSDACH})]^{2+}$  in DMSO, F1/F2  $^1\text{H}$  dimension spectral width of 8250 Hz and 65536 data points.

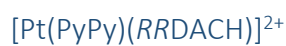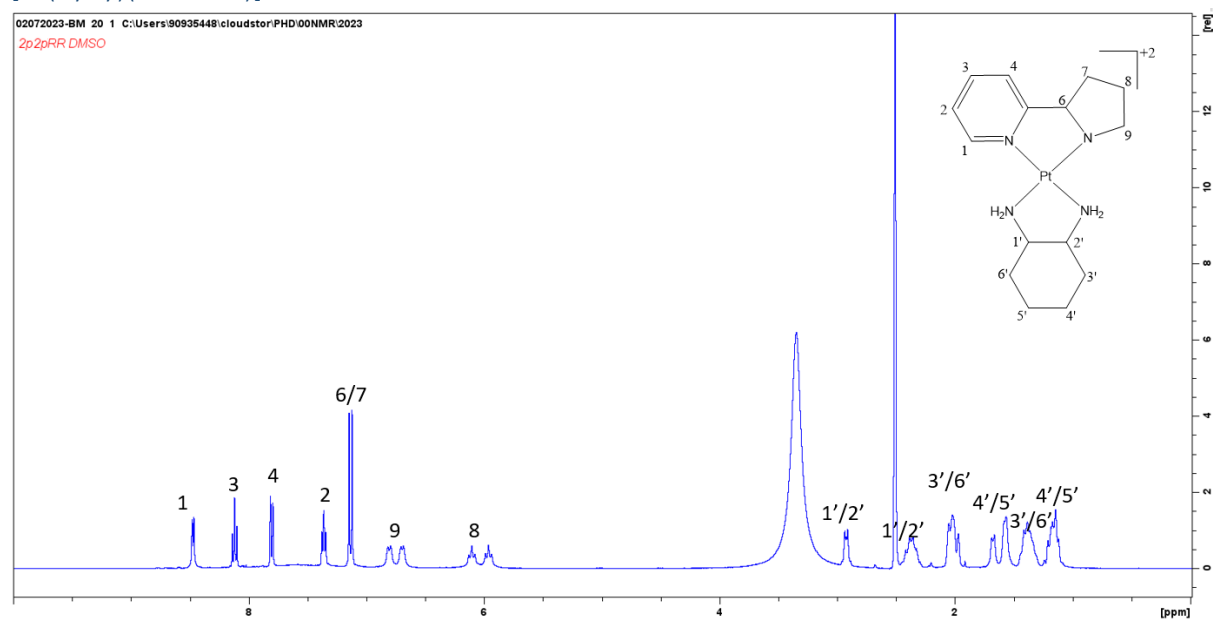

**Figure S13:**  $^1\text{H}$  NMR spectra of 4b  $[\text{Pt}(\text{PyPy})(\text{RRDACH})]^{2+}$  in DMSO, spectral width of 8250 Hz and 65536 data points.

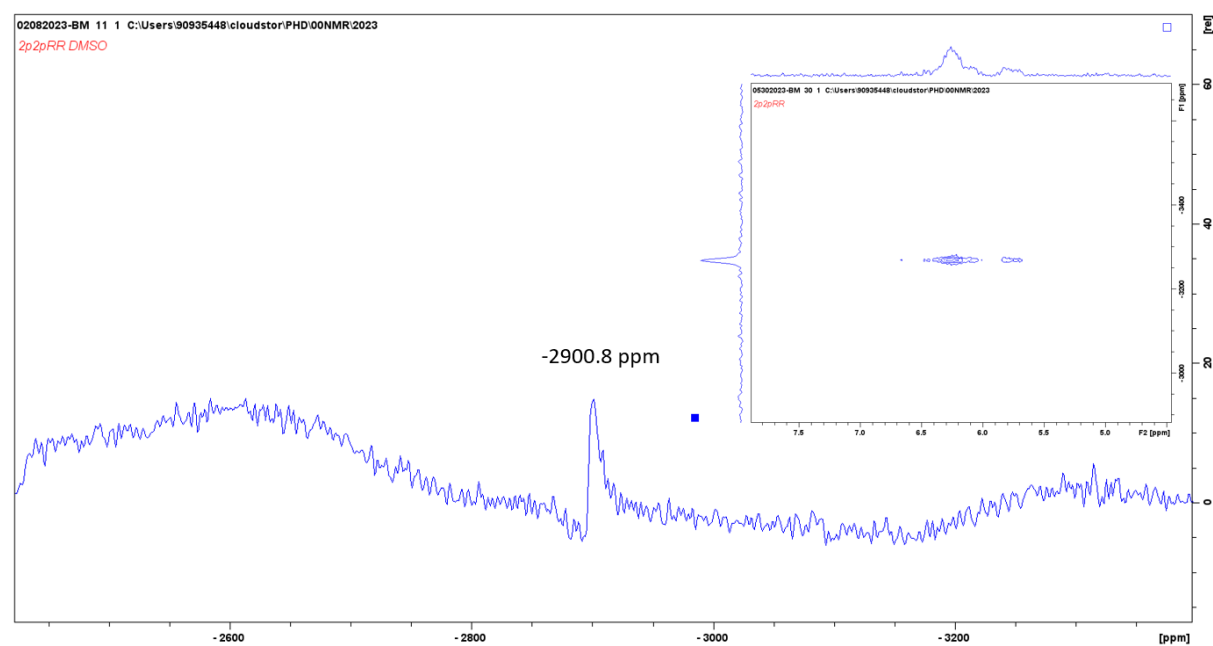

**Figure S14:**  $^{195}\text{Pt}$  peak spectra of 4b  $[\text{Pt}(\text{PyPy})(\text{RRDACH})]^{2+}$  in DMSO, spectral width of 214436 Hz and 256 data points for the  $^{195}\text{Pt}$  nucleus (F1 dimension) and a spectral width of 4808 Hz with 2048 data points for the  $^1\text{H}$  nucleus (F2 dimension).

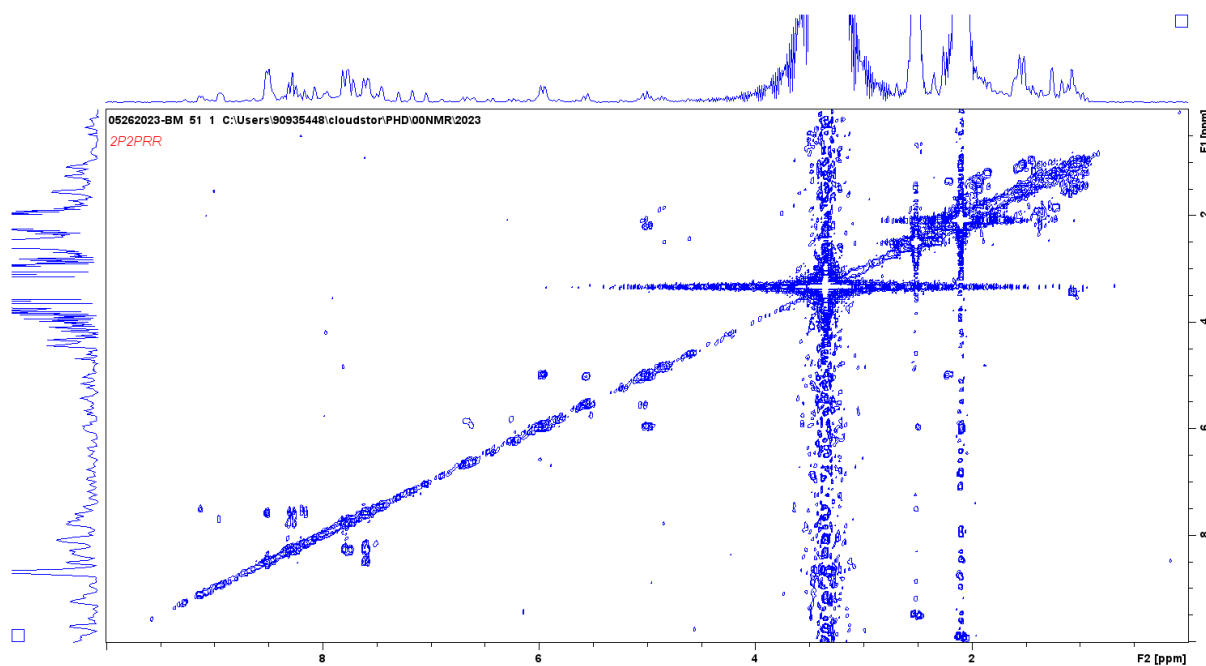

**Figure S15:**  $^1\text{H}/^1\text{H}$  COSY spectra of 4b  $[\text{Pt}(\text{PyPy})(\text{RRDACH})]^{2+}$  in DMSO, F1/F2  $^1\text{H}$  dimension spectral width of 8250 Hz and 65536 data points.

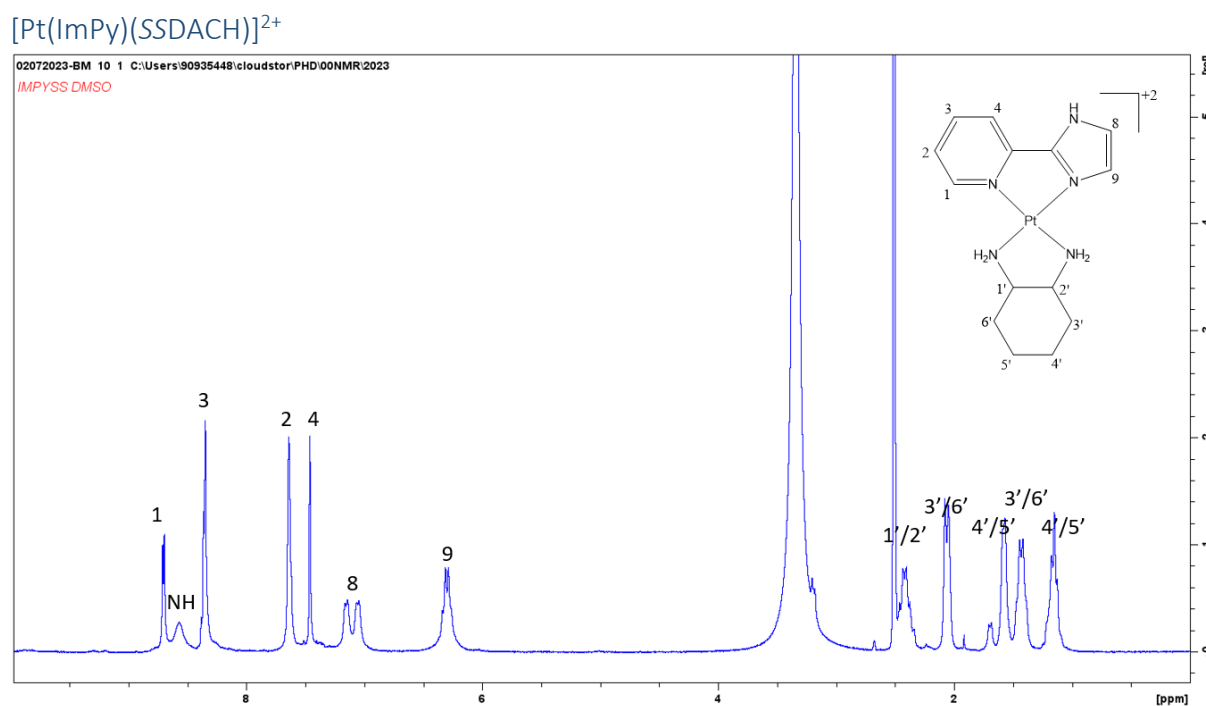

**Figure S16:**  $^1\text{H}$  NMR spectra of 5a  $[\text{Pt}(\text{ImPy})(\text{SSDACH})]^{2+}$  in DMSO, spectral width of 8250 Hz and 65536 data points.

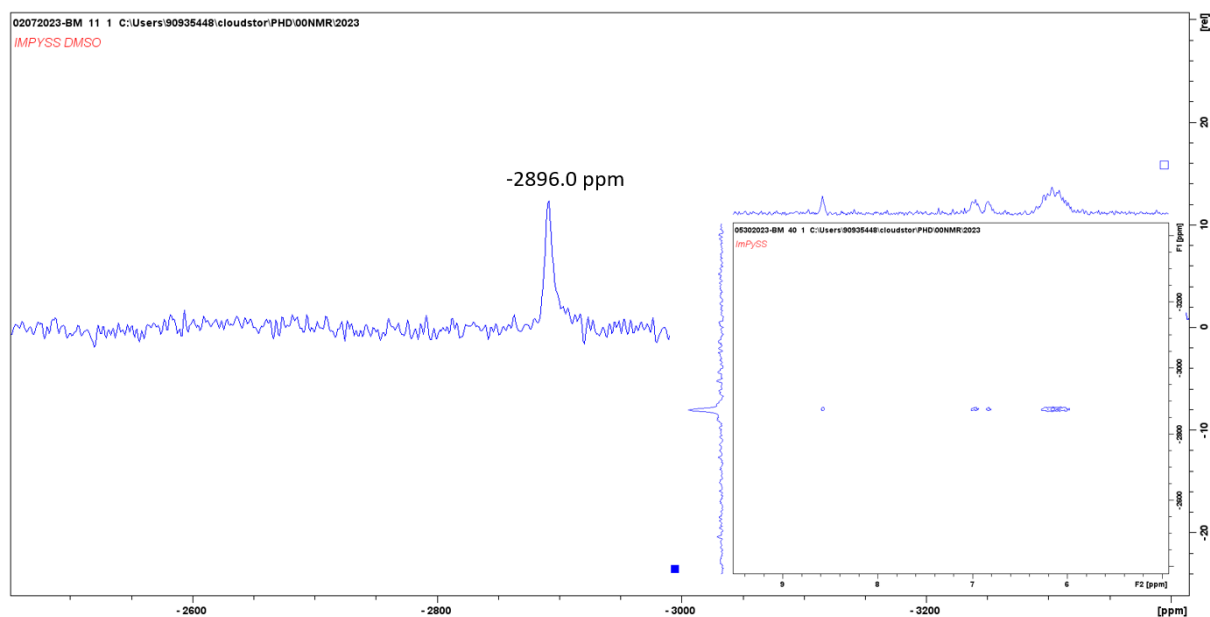

**Figure S17:**  $^{195}\text{Pt}$  peak spectra of 5a  $[\text{Pt}(\text{ImPy})(\text{SSDACH})]^{2+}$  in DMSO, spectral width of 8250 Hz and 65536 data points.

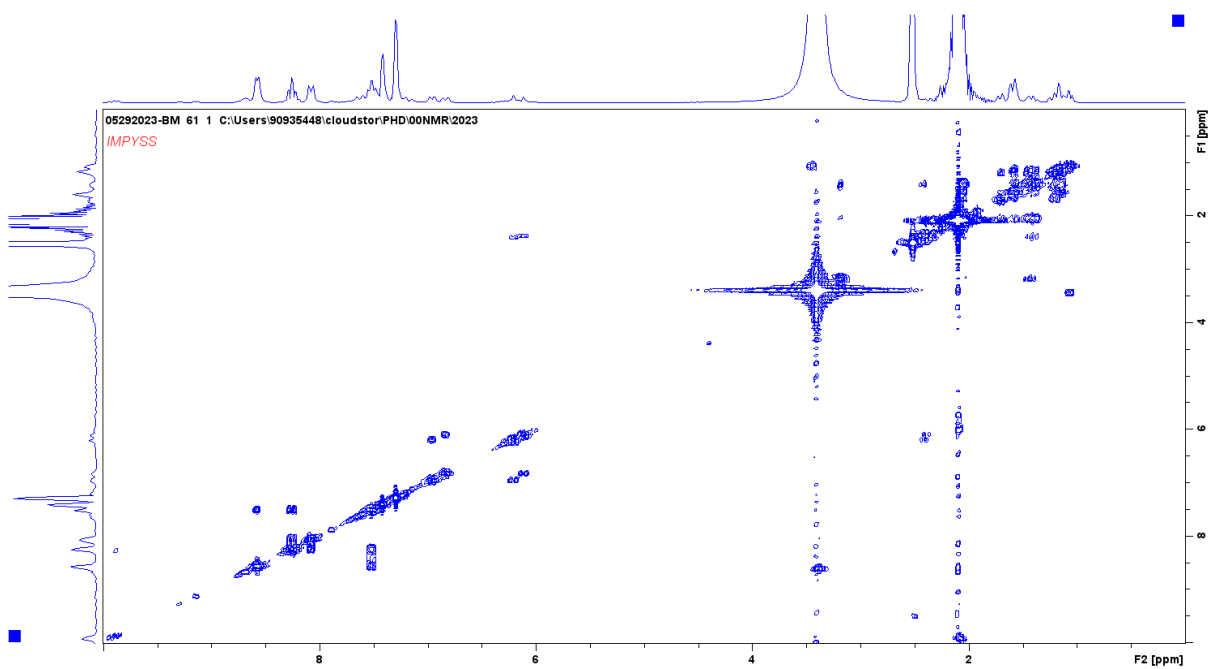

**Figure S18:**  $^1\text{H}/^1\text{H}$  COSY spectra of 5a  $[\text{Pt}(\text{ImPy})(\text{SSDACH})]^{2+}$  in DMSO, F1/F2  $^1\text{H}$  dimension spectral width of 8250 Hz and 65536 data points.

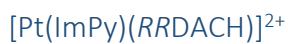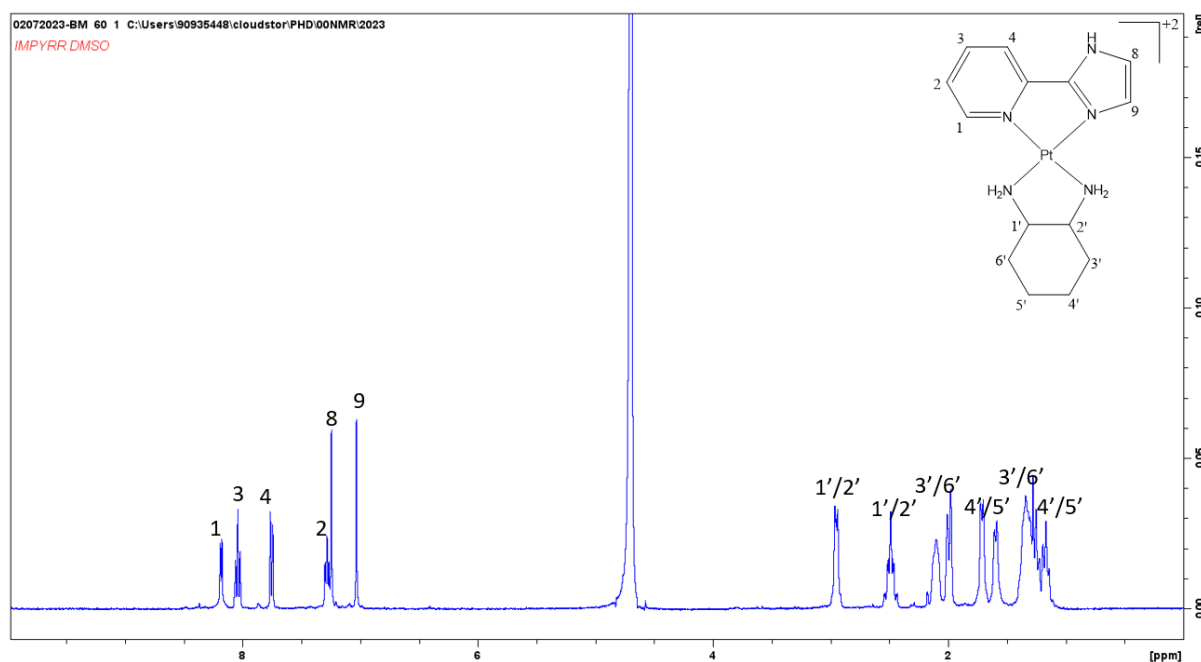

**Figure S19:**  $^1\text{H}$  NMR spectra of 5b  $[\text{Pt}(\text{ImPy})(\text{RRDACH})]^{2+}$  in DMSO, spectral width of 8250 Hz and 65536 data points.

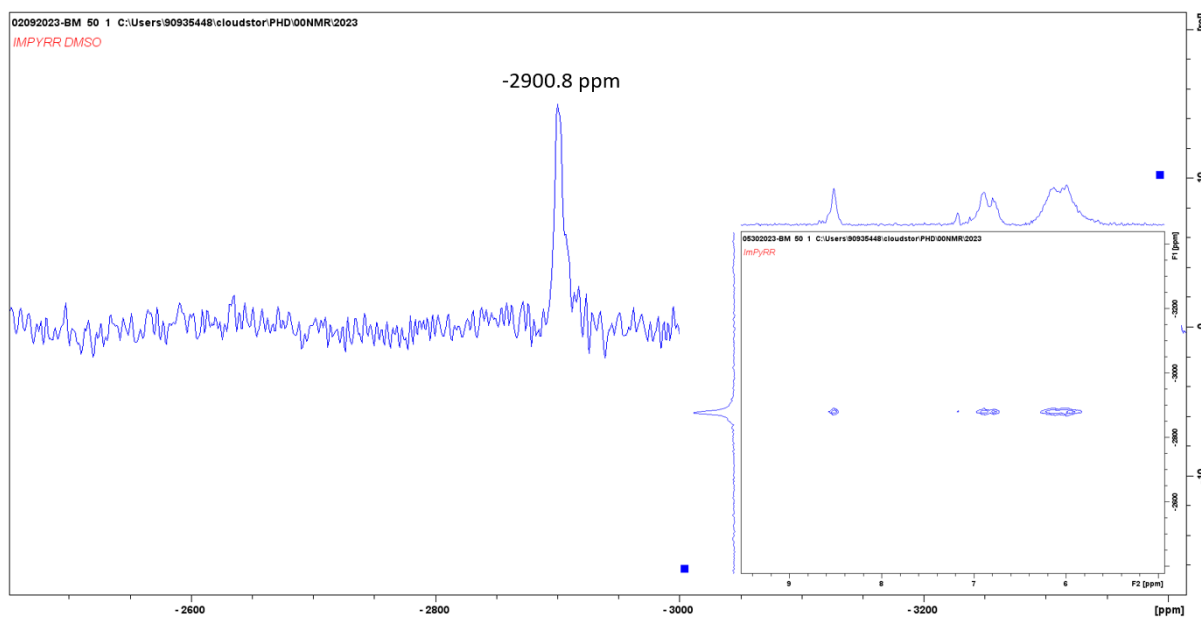

**Figure S20:**  $^{195}\text{Pt}$  peak spectra of 5b  $[\text{Pt}(\text{ImPy})(\text{RRDACH})]^{2+}$  in DMSO, spectral width of 214436 Hz and 256 data points for the  $^{195}\text{Pt}$  nucleus (F1 dimension) and a spectral width of 4808 Hz with 2048 data points for the  $^1\text{H}$  nucleus (F2 dimension).

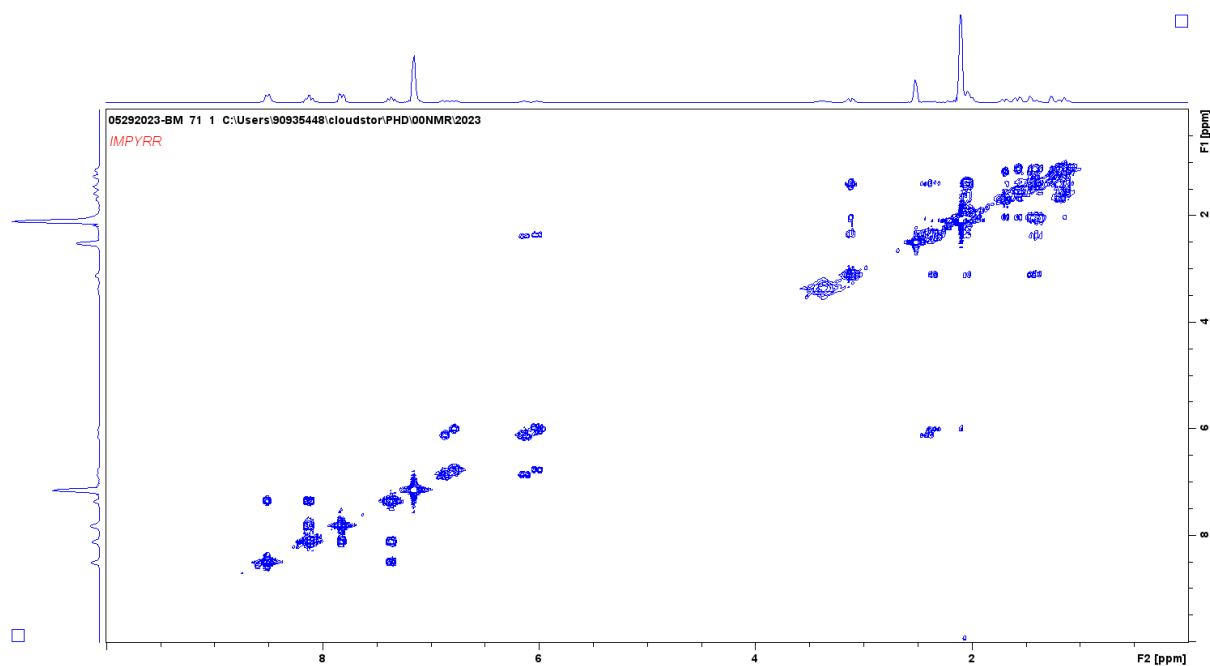

**Figure S21:**  $^1\text{H}/^1\text{H}$  COSY spectra of 5b  $[\text{Pt}(\text{ImPy})(\text{RRDACH})]^{2+}$  in DMSO, F1/F2  $^1\text{H}$  dimension spectral width of 8250 Hz and 65536 data points.

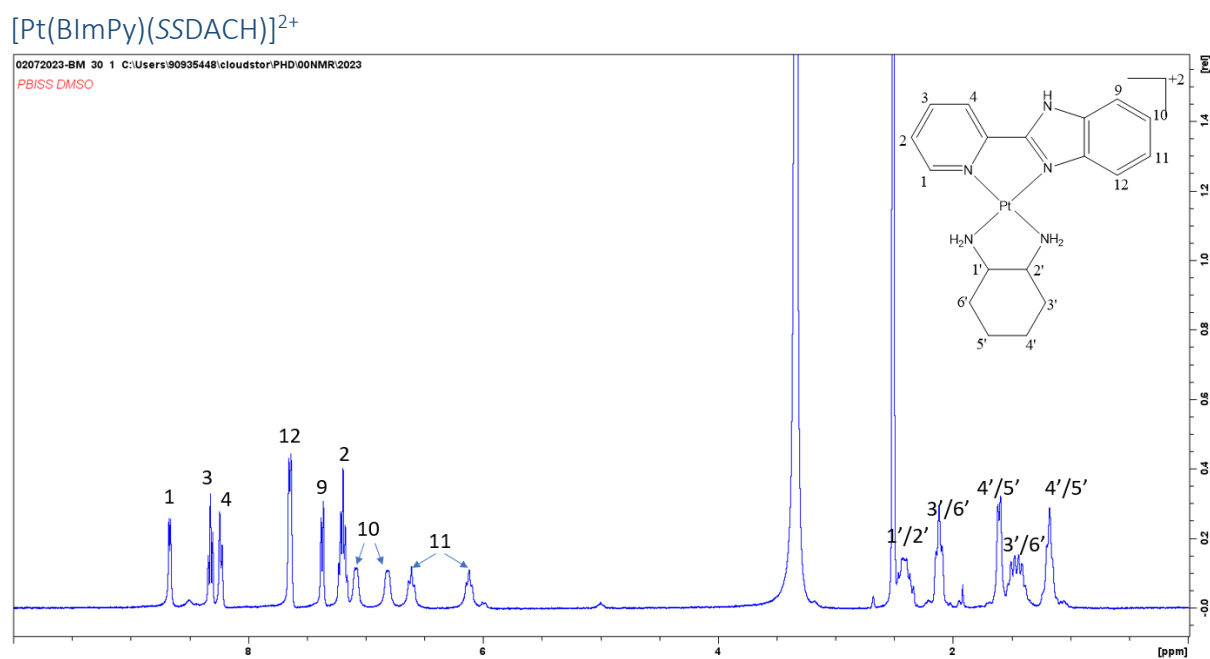

**Figure S22:**  $^1\text{H}$  NMR spectra of 5b  $[\text{Pt}(\text{BImPy})(\text{SSDACH})]^{2+}$  in DMSO, spectral width of 8250 Hz and 65536 data points.

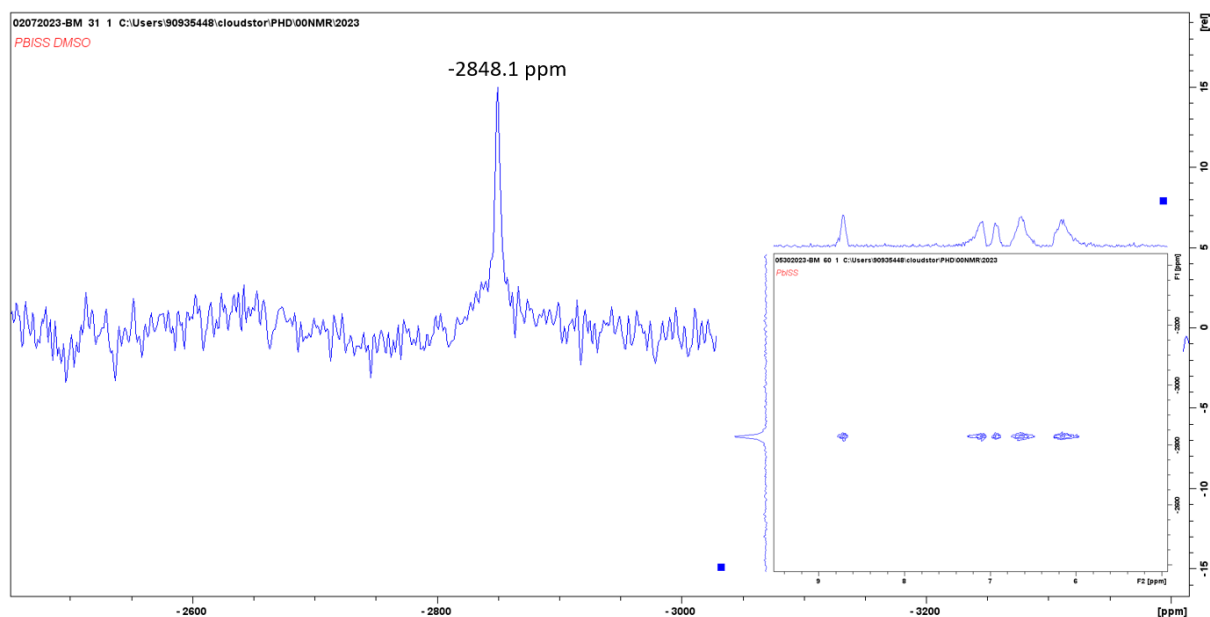

**Figure S23:**  $^{195}\text{Pt}$  peak spectra of  $6a$   $[\text{Pt}(\text{BImPy})(\text{SSDACH})]^{2+}$  in DMSO, spectral width of 214436 Hz and 256 data points for the  $^{195}\text{Pt}$  nucleus (F1 dimension) and a spectral width of 4808 Hz with 2048 data points for the  $^1\text{H}$  nucleus (F2 dimension).

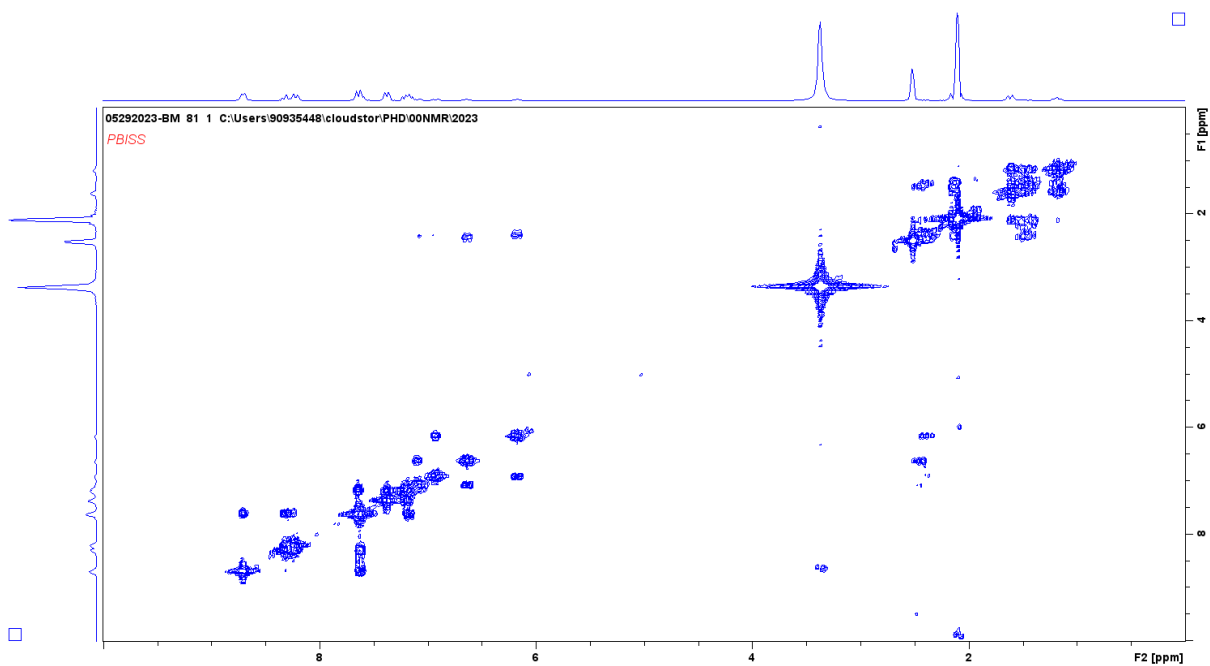

**Figure S24:**  $^1\text{H}/^1\text{H}$  COSY spectra of  $6a$   $[\text{Pt}(\text{BImPy})(\text{SSDACH})]^{2+}$  in DMSO, F1/F2  $^1\text{H}$  dimension spectral width of 8250 Hz and 65536 data points.



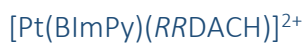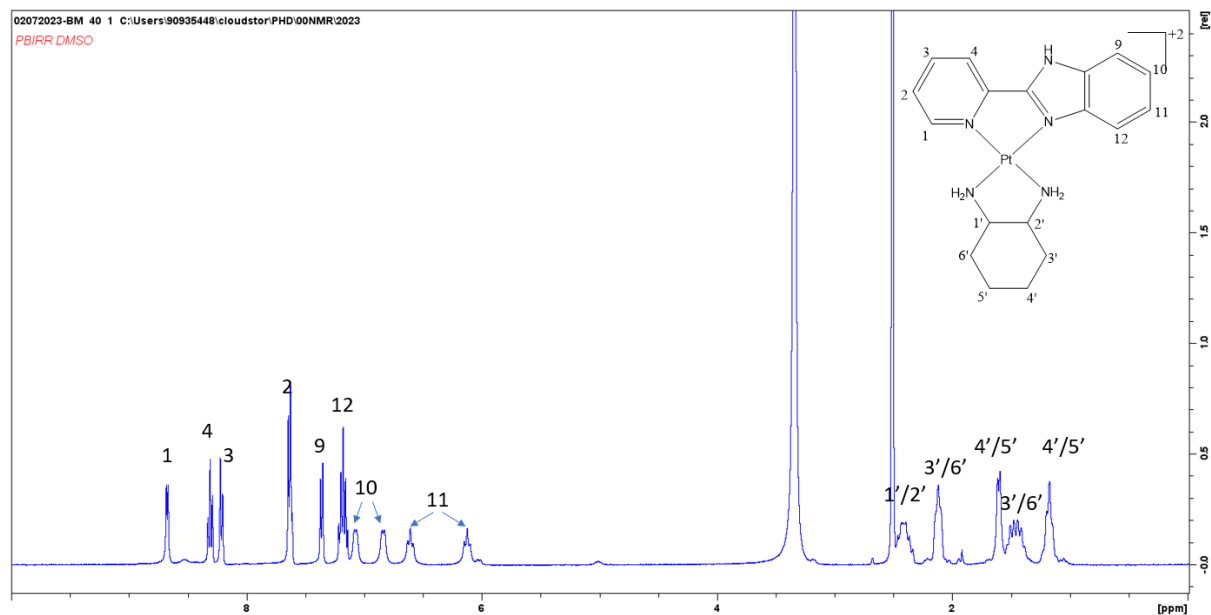

**Figure S25:**  $^1\text{H}$  NMR spectra of 6b  $[\text{Pt}(\text{BlmPy})(\text{SSDACH})]^{2+}$  in DMSO, spectral width of 8250 Hz and 65536 data points.

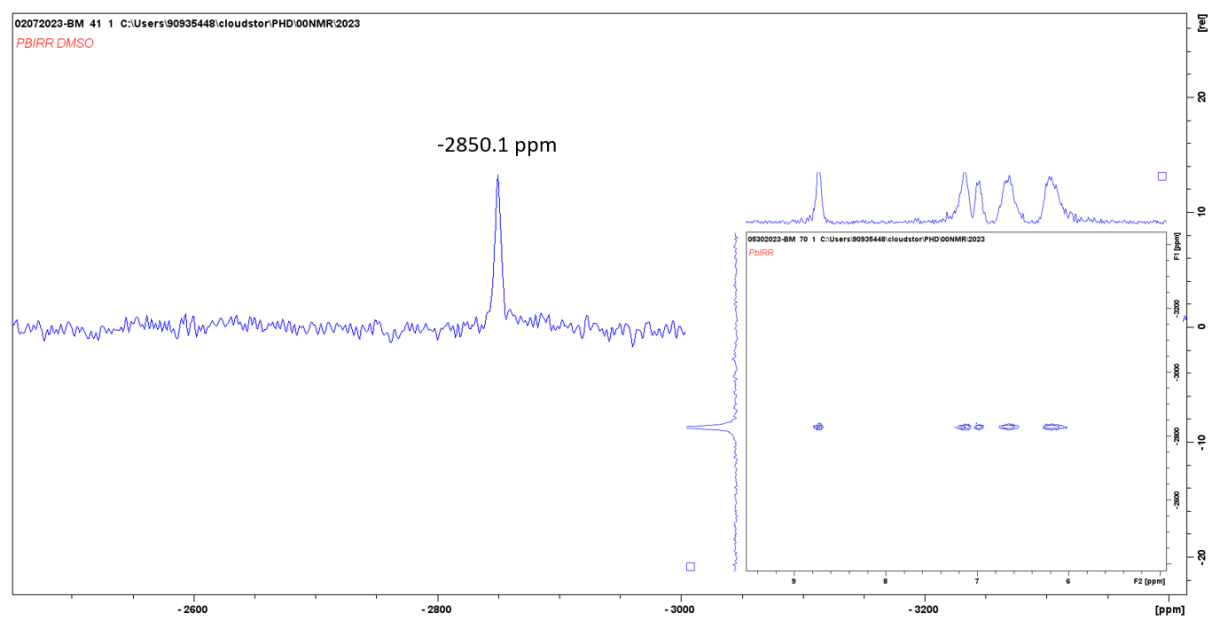

**Figure S26:**  $^{195}\text{Pt}$  peak spectra of 6b  $[\text{Pt}(\text{BlmPy})(\text{SSDACH})]^{2+}$  in DMSO, spectral width of 214436 Hz and 256 data points for the  $^{195}\text{Pt}$  nucleus (F1 dimension) and a spectral width of 4808 Hz with 2048 data points for the  $^1\text{H}$  nucleus (F2 dimension).

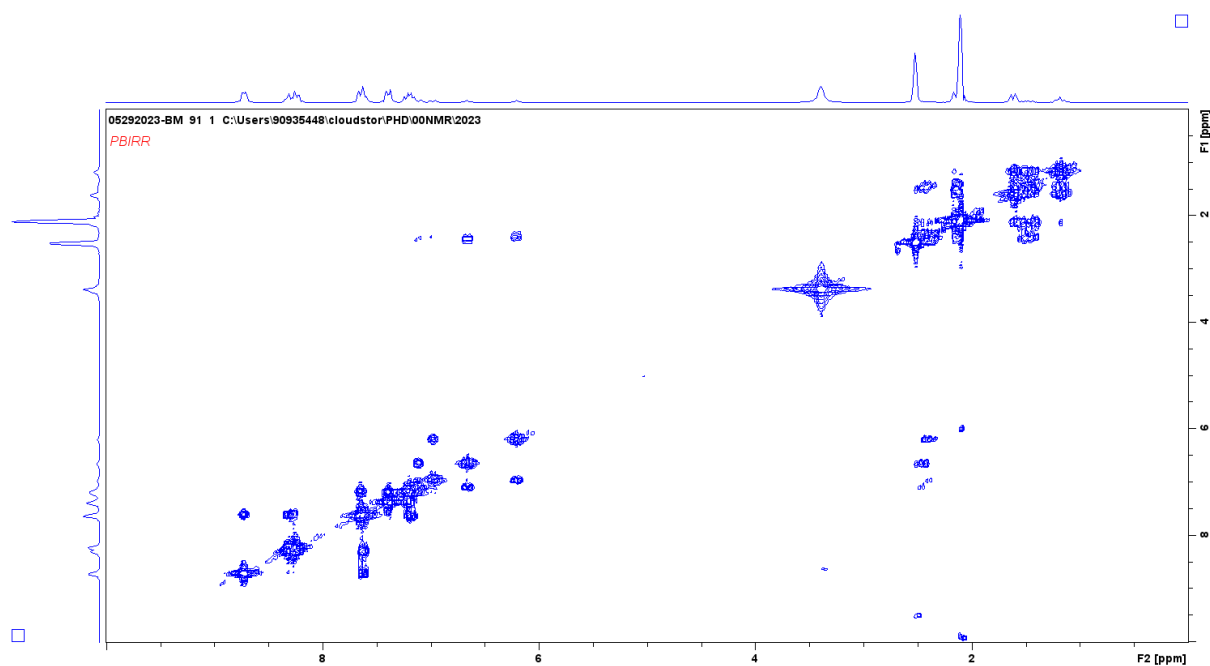

**Figure S27:**  $^1\text{H}/^1\text{H}$  COSY spectra of **6b**  $[\text{Pt}(\text{BImPy})(\text{RRDACH})]^{2+}$  in DMSO, F1/F2  $^1\text{H}$  dimension spectral width of 8250 Hz and 65536 data points.

## Molar Absorption Coefficients

$[\text{Pt}(\text{PyPy})(\text{SSDACH})]^{2+}$

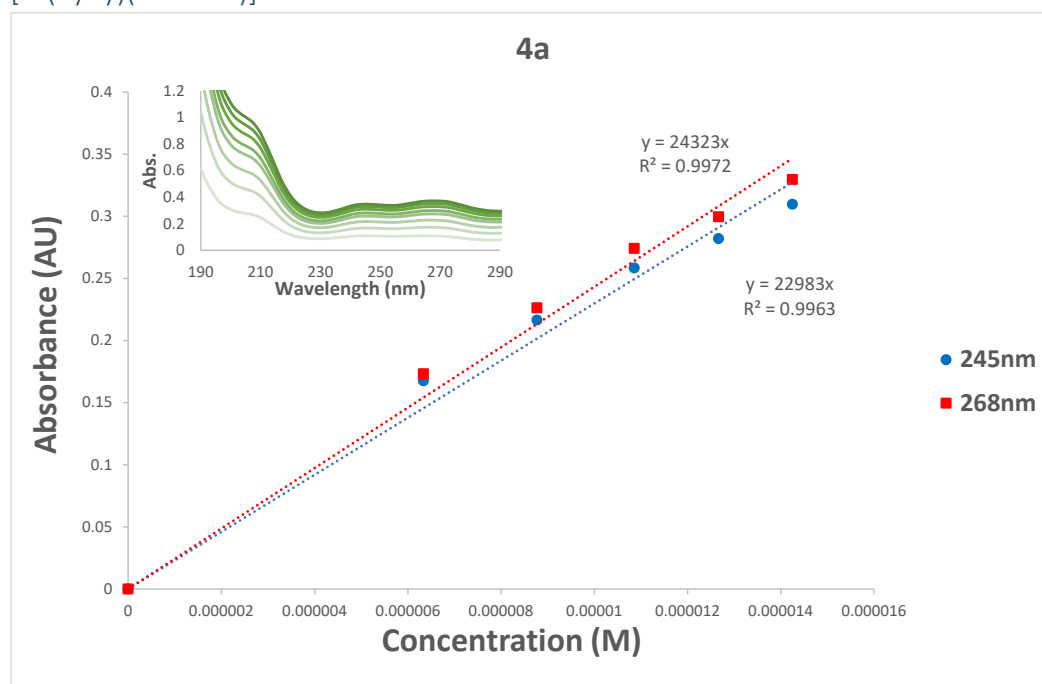

**Figure S28:** Titration of a stock solution of 4a  $[\text{Pt}(\text{PyPy})(\text{SSDACH})]^{2+}$  into a known concentration in  $\text{H}_2\text{O}$  and the resulting extinction coefficient calculated based on the two main peaks at 241 nm (red) and 287 nm (blue).

$[\text{Pt}(\text{PyPy})(\text{RRDACH})]^{2+}$

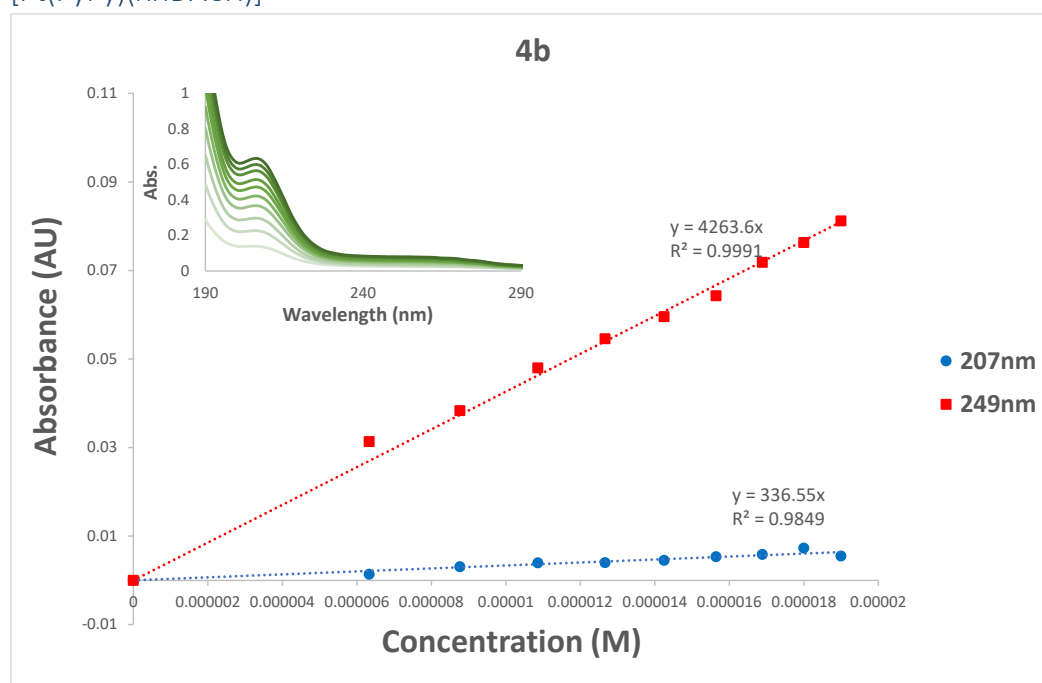

**Figure S29:** Titration of a stock solution of 4b  $[\text{Pt}(\text{PyPy})(\text{RRDACH})]^{2+}$  into a known concentration in  $\text{H}_2\text{O}$  and the resulting extinction coefficient calculated based on the two main peaks at 241 nm (red) and 287 nm (blue).

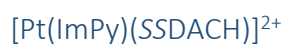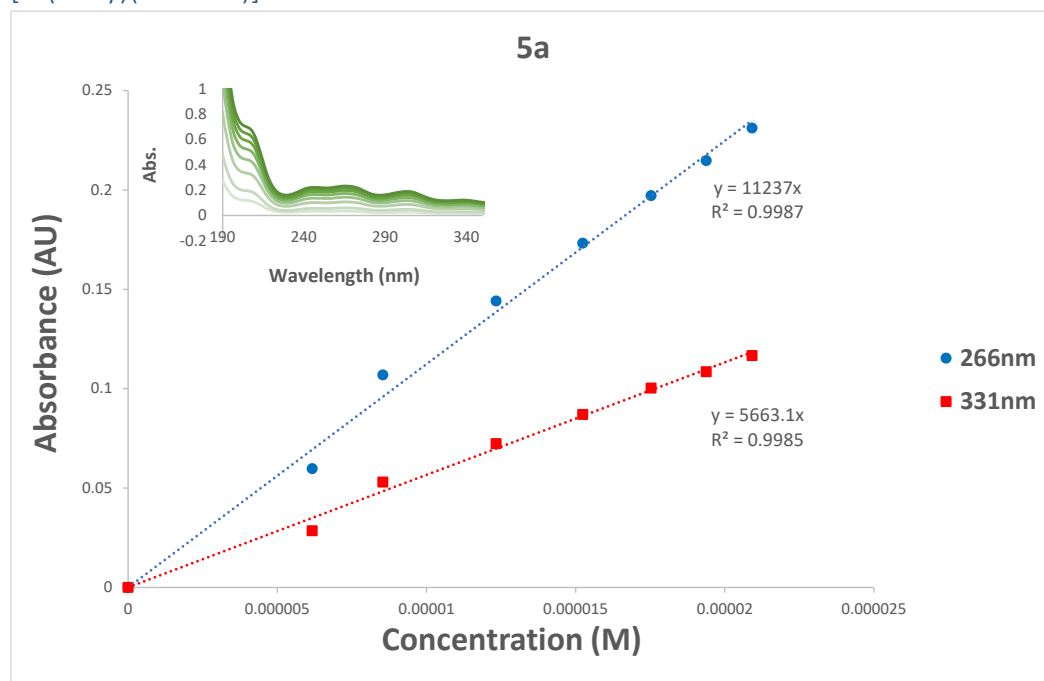

**Figure S30:** Titration of a stock solution of 5a  $[\text{Pt}(\text{ImPy})(\text{SSDACH})]^{2+}$  into a known concentration in  $\text{H}_2\text{O}$  and the resulting extinction coefficient calculated based on the two main peaks at 241 nm (red) and 287 nm (blue).

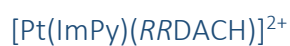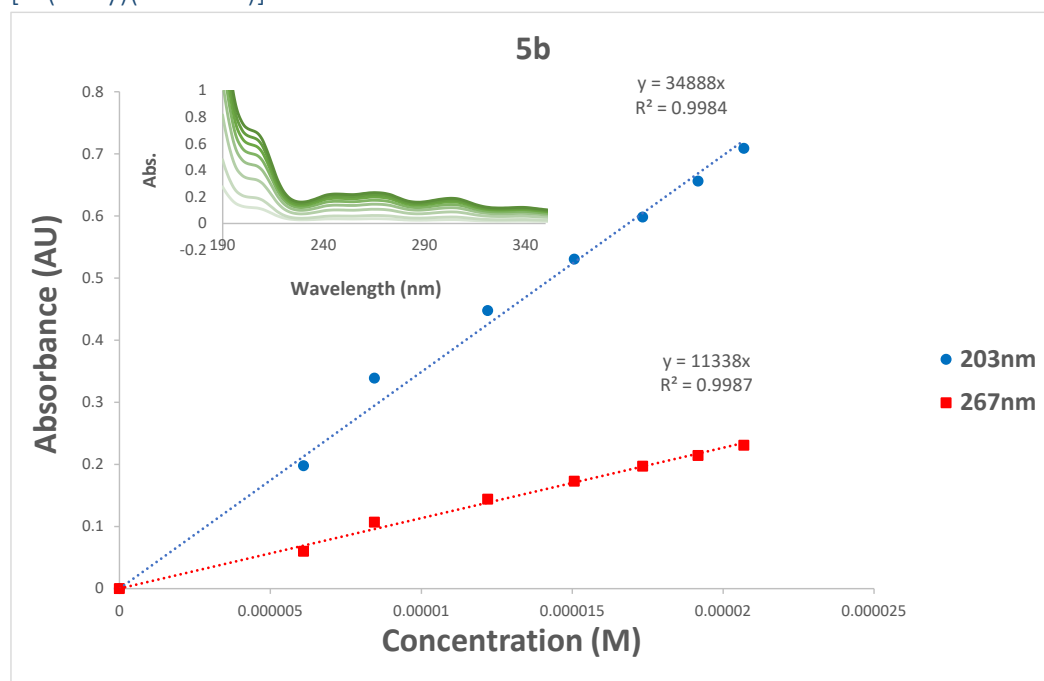

**Figure S31:** Titration of a stock solution of 5b  $[\text{Pt}(\text{ImPy})(\text{RRDACH})]^{2+}$  into a known concentration in  $\text{H}_2\text{O}$  and the resulting extinction coefficient calculated based on the two main peaks at 241 nm (red) and 287 nm (blue).

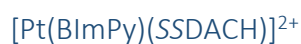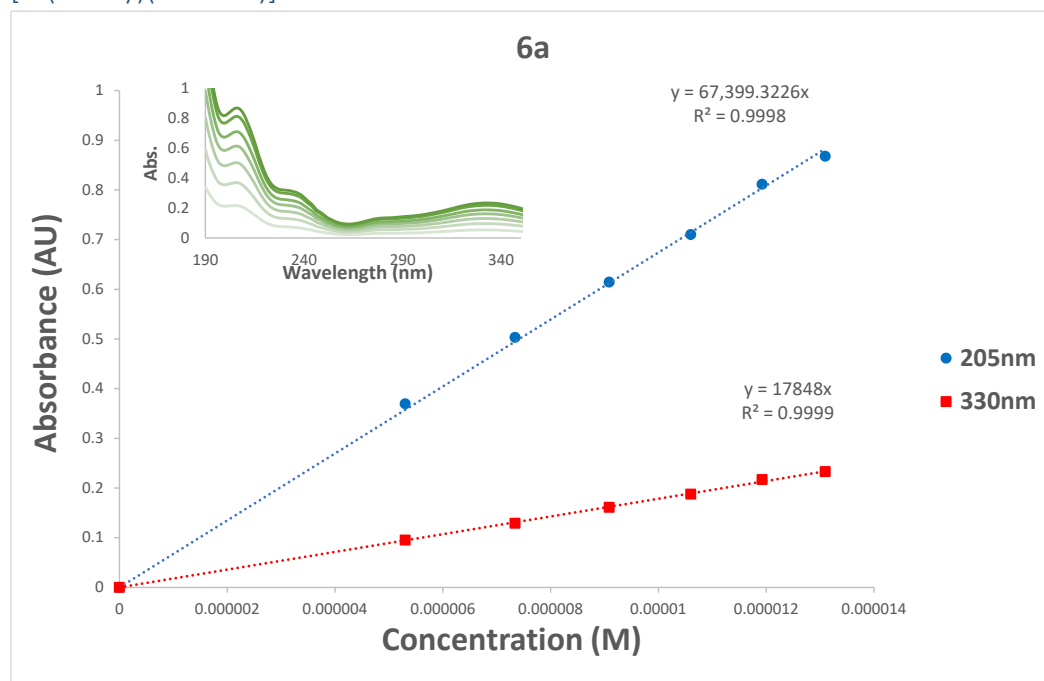

**Figure S32:** Titration of a stock solution of 6a  $[\text{Pt}(\text{BlmPy})(\text{SSDACH})]^{2+}$  into a known concentration in  $\text{H}_2\text{O}$  and the resulting extinction coefficient calculated based on the two main peaks at 330 nm (red) and 205 nm (blue).

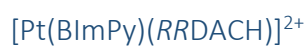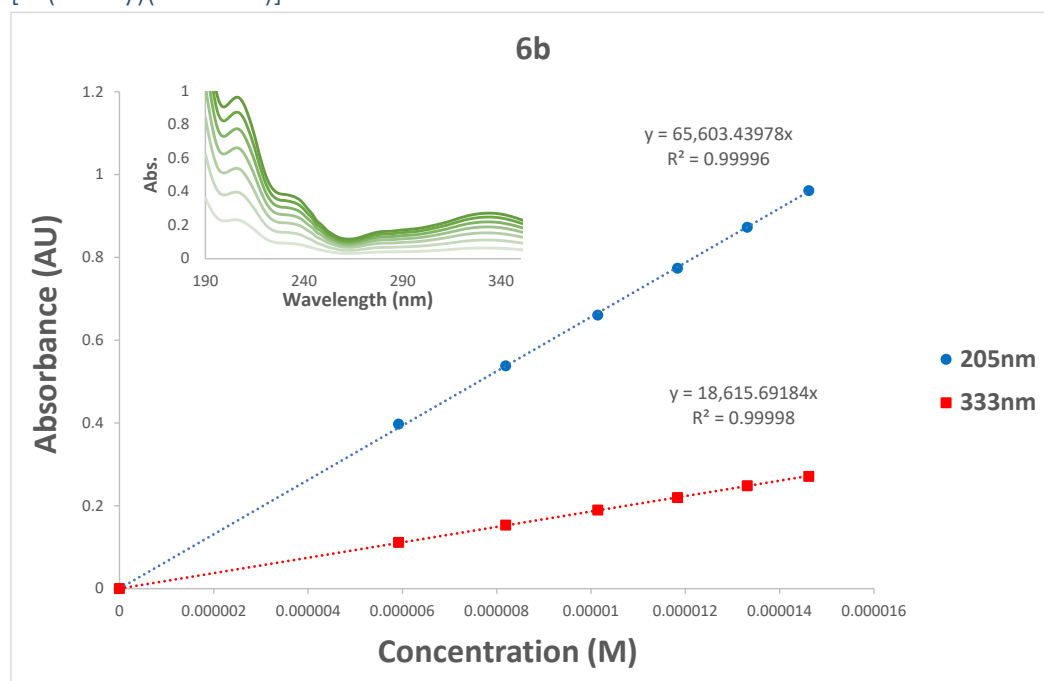

**Figure S33:** Titration of a stock solution of 6b  $[\text{Pt}(\text{BlmPy})(\text{RRDACH})]^{2+}$  into a known concentration in  $\text{H}_2\text{O}$  and the resulting extinction coefficient calculated based on the two main peaks at 241 nm (red) and 287 nm (blue).

## HPLC

All HPLC's show purity over 95%

$[\text{Pt}(\text{PyPy})(\text{SSDACH})]^{2+}$

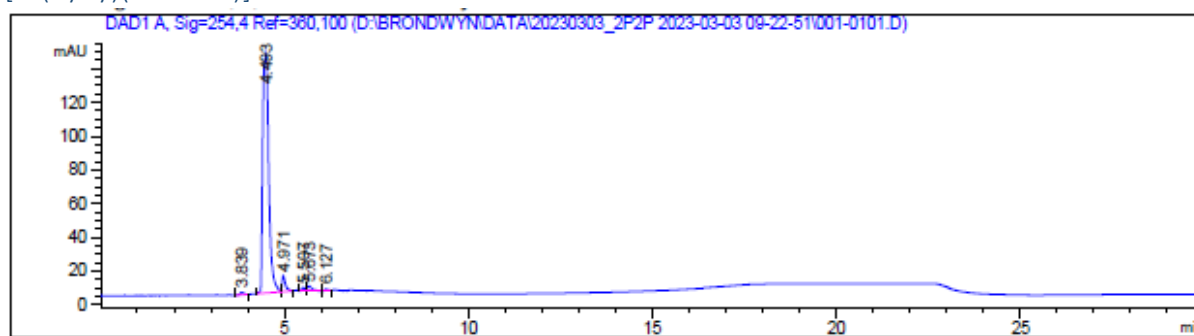

**Figure S34.** HPLC spectrum of 4a ( $[\text{Pt}(2\text{P}2\text{P})(\text{SSDACH})]^{2+}$ ) measured on a Agilent Technologies 1260 Infinity machine equipped with a Phenomenex Onyx™ Monolithic C18 reverse phase column (100 × 4.6 mm, 130 Å). Sample solutions were made up in  $\text{H}_2\text{O}$  and injected at a 0-100 gradient A to B over 15 minutes with a 15 minute flush in-between samples.

$[\text{Pt}(\text{ImPy})(\text{SSDACH})]^{2+}$

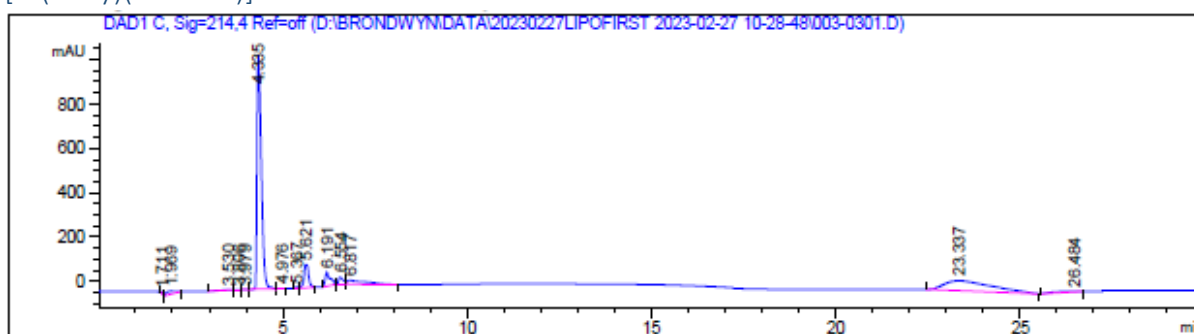

**Figure S35.** HPLC spectrum of 4b ( $[\text{Pt}(\text{ImPy})(\text{SSDACH})]^{2+}$ ) measured on a Agilent Technologies 1260 Infinity machine equipped with a Phenomenex Onyx™ Monolithic C18 reverse phase column (100 × 4.6 mm, 130 Å). Sample solutions were made up in  $\text{H}_2\text{O}$  and injected at a 0-100 gradient A to B over 15 minutes with a 15 minute flush in-between samples.

$[\text{Pt}(\text{BlmPy})(\text{SSDACH})]^{2+}$

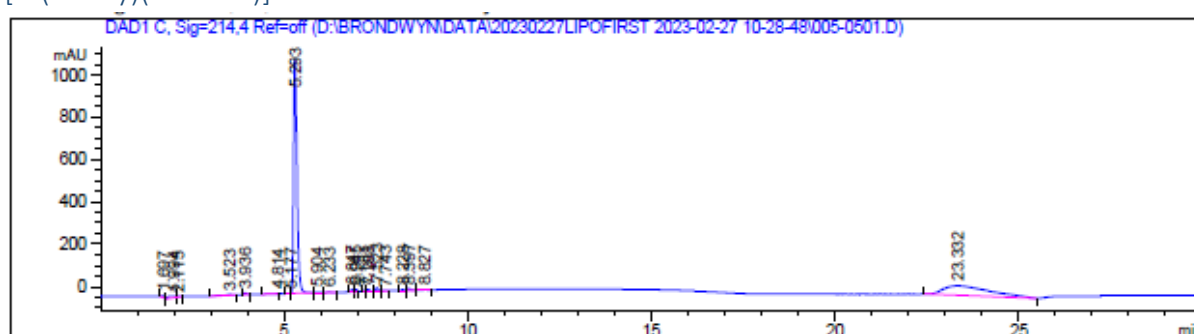

**Figure S36.** HPLC spectrum of 5a ( $[\text{Pt}(\text{BlmPy})(\text{SSDACH})]^{2+}$ ) measured on a Agilent Technologies 1260 Infinity machine equipped with a Phenomenex Onyx™ Monolithic C18 reverse phase column (100 × 4.6 mm, 130 Å). Sample solutions were made up in  $\text{H}_2\text{O}$  and injected at a 0-100 gradient A to B over 15 minutes with a 15 minute flush in-between samples.

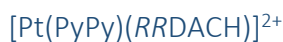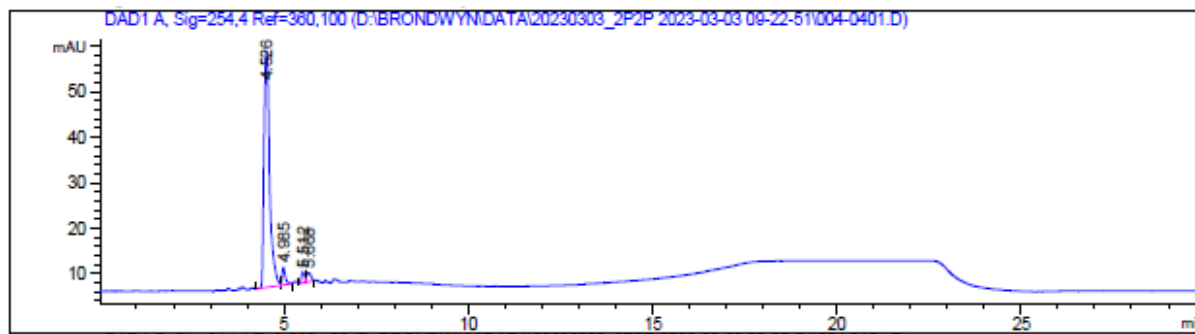

**Figure S37.** HPLC spectrum of 5b ( $[\text{Pt}(2\text{P}2\text{P})(\text{RRDACH})]^{2+}$ ) measured on a Agilent Technologies 1260 Infinity machine equipped with a Phenomenex Onyx™ Monolithic C18 reverse phase column ( $100 \times 4.6$  mm,  $130 \text{ \AA}$ ). Sample solutions were made up in  $\text{H}_2\text{O}$  and injected at a 0-100 gradient A to B over 15 minutes with a 15 minute flush in-between samples.

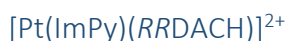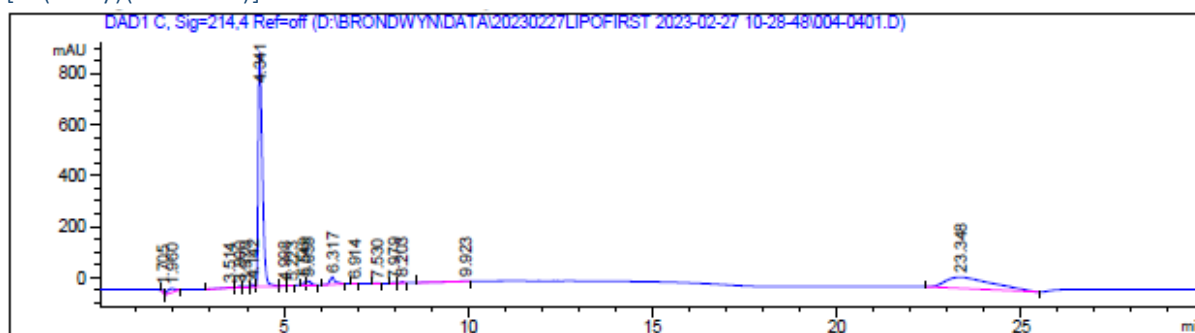

**Figure S38.** HPLC spectrum of 6a ( $[\text{Pt}(\text{ImPy})(\text{RRDACH})]^{2+}$ ) measured on a Agilent Technologies 1260 Infinity machine equipped with a Phenomenex Onyx™ Monolithic C18 reverse phase column ( $100 \times 4.6$  mm,  $130 \text{ \AA}$ ). Sample solutions were made up in  $\text{H}_2\text{O}$  and injected at a 0-100 gradient A to B over 15 minutes with a 15 minute flush in-between samples.

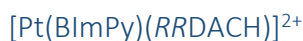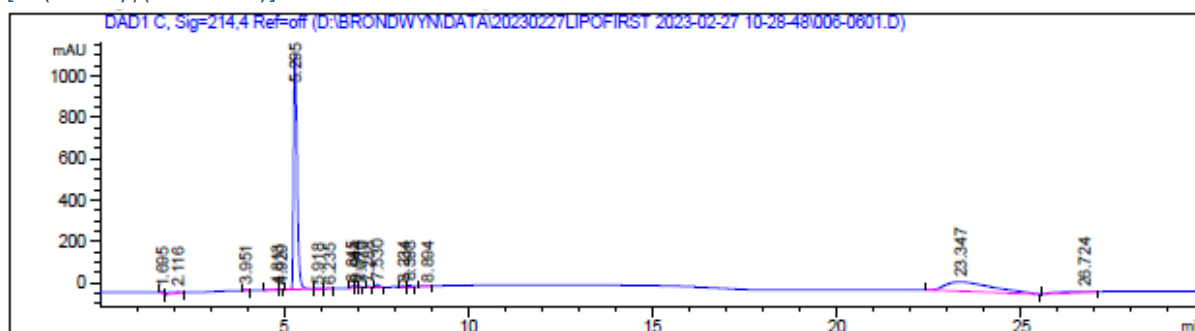

**Figure S39.** HPLC spectrum of 6b ( $[\text{Pt}(\text{BlmPy})(\text{RRDACH})]^{2+}$ ) measured on a Agilent Technologies 1260 Infinity machine equipped with a Phenomenex Onyx™ Monolithic C18 reverse phase column ( $100 \times 4.6$  mm,  $130 \text{ \AA}$ ). Sample solutions were made up in  $\text{H}_2\text{O}$  and injected at a 0-100 gradient A to B over 15 minutes with a 15 minute flush in-between samples.

CD

$[\text{Pt}(\text{PyPy})(\text{SSDACH})]^{2+}$

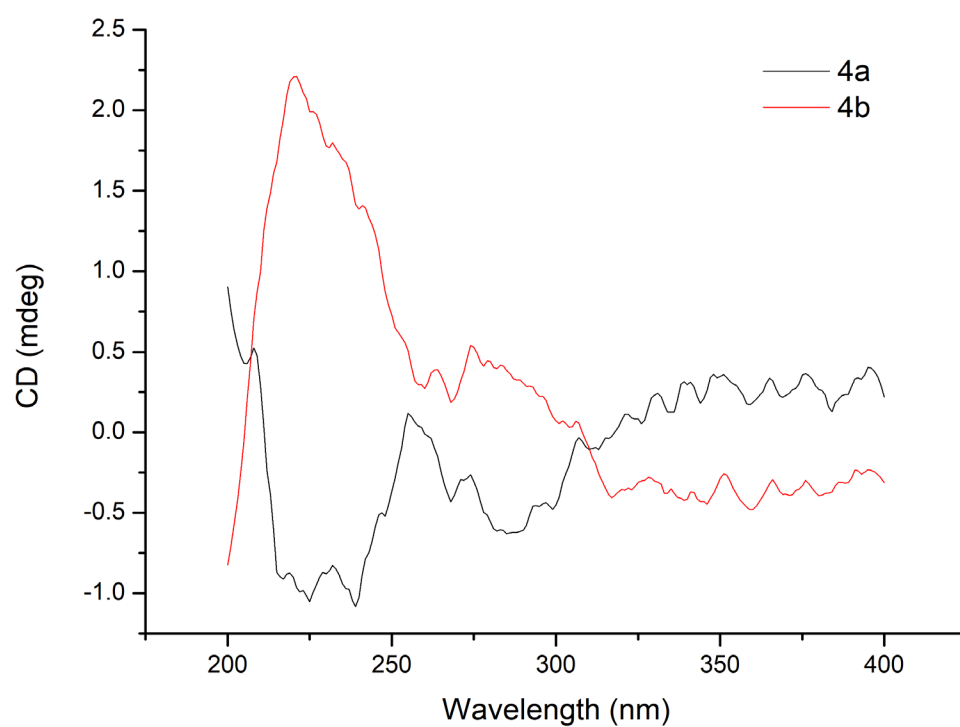

**Figure S40:** CD spectra of **4a** ( $[\text{Pt}(\text{2P2P})(\text{SSDACH})]^{2+}$ ) (black) and **4b** ( $[\text{Pt}(\text{2P2P})(\text{RRDACH})]^{2+}$ ) (red) at room temperature in the 200–400 nm range, using a 10 mm quartz cell, corrected for solvent baseline, measured in  $\text{H}_2\text{O}$



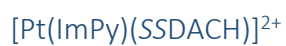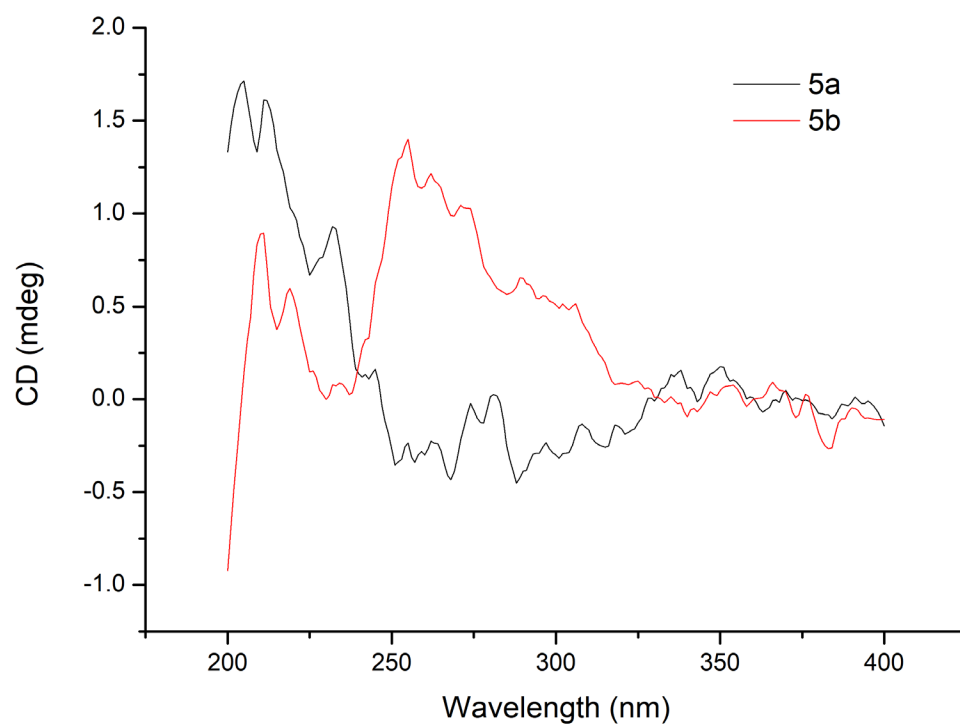

**Figure S41:** CD spectra of **5a** ( $[\text{Pt}(\text{ImPy})(\text{SSDACH})]^{2+}$ ) (black) and **5b** ( $[\text{Pt}(\text{ImPy})(\text{RRDACH})]^{2+}$ ) (red) at room temperature in the 200–400 nm range, using a 10 mm quartz cell, corrected for solvent baseline, measured in  $\text{H}_2\text{O}$

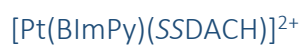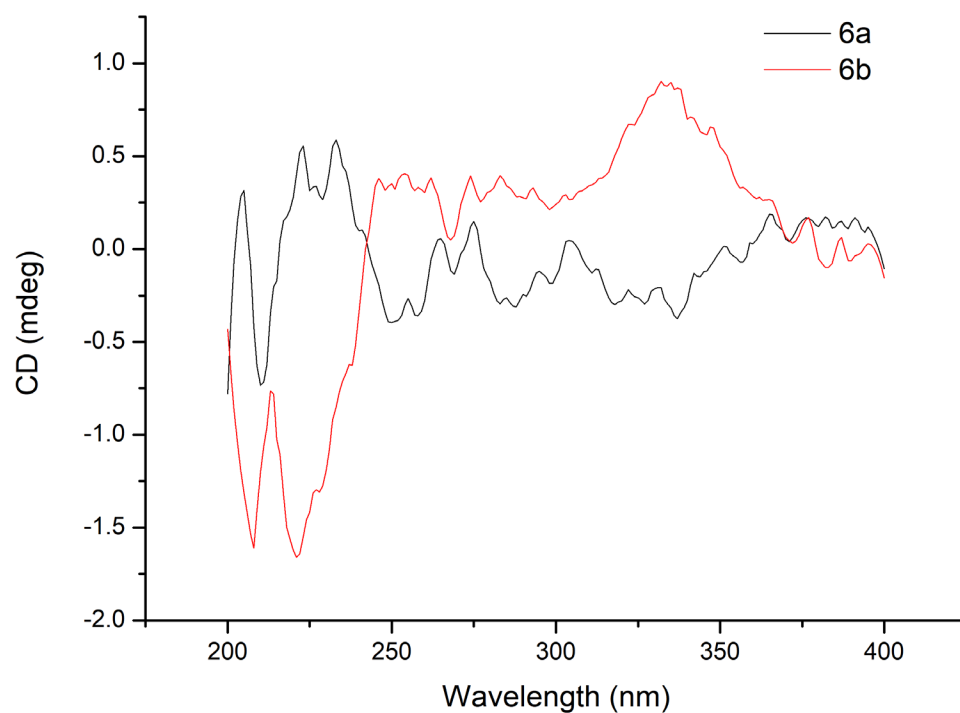

**Figure S42:** CD spectra of **6a** ( $[\text{Pt}(\text{BImPy})(\text{SSDACH})]^{2+}$ ) (black) and **6b** ( $[\text{Pt}(\text{BImPy})(\text{RRDACH})]^{2+}$ ) (red) at room temperature in the 200–400 nm range, using a 10 mm quartz cell, corrected for solvent baseline, measured in  $\text{H}_2\text{O}$

## ESI MS

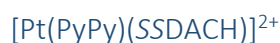

## Elemental Composition Report

Page 1

## Multiple Mass Analysis: 2 mass(es) processed

Tolerance = 20.0 PPM / DBE: min = -1.5, max = 50.0

Element prediction: Off

Number of isotope peaks used for i-FIT = 9

Monoisotopic Mass, Even Electron Ions

140 formula(e) evaluated with 2 results within limits (all results (up to 1000) for each mass)

Elements Used:

C: 0-27 H: 0-35 N: 0-5 Na: 0-1 Br: 0-1 Pt: 1-1

230403 1 32 (0.637) AM2 (Ar,20000.0,556.28,0.00,LS 3); Cm (27:41)

1: TOF MS ES+

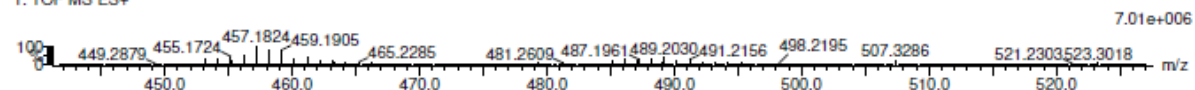

Minimum: 80.00  
Maximum: 100.00

| Mass     | RA     | Calc. Mass | mDa  | PPM   | DBE | 1-FIT  | Norm | Conf(%) | Formula          |
|----------|--------|------------|------|-------|-----|--------|------|---------|------------------|
| 457.1824 | 100.00 | 457.1907   | -8.3 | -18.2 | 2.5 | 1888.3 | n/a  | n/a     | C14 H29 N3 Na Pt |
| 459.1905 | 80.25  | 459.1836   | 6.9  | 15.0  | 5.5 | 1959.3 | n/a  | n/a     | C14 H26 N5 Pt    |

230403\_1 32 (0.637) AM2 (Ar,20000.0,556.28,0.00,LS 3); Cm (27:41)

1: TOF MS ES+  
2.05e7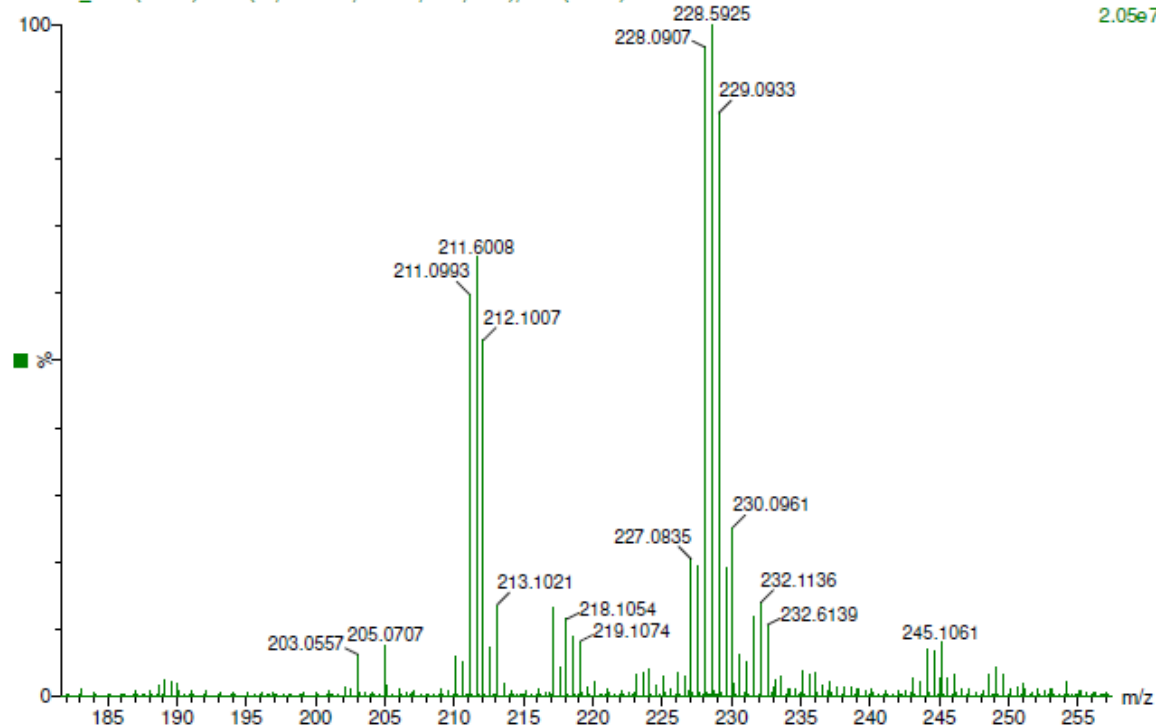

**Figure S43.** ESIMS spectrum of  $[\text{Pt}(\text{PyPy})(\text{SSDACH})]^{+2}$  measured on a Waters TQ-MS triple quadrupole mass spectrometer. Sample solutions were made up to 0.3 mM in  $\text{H}_2\text{O}$ : MeOH (90:10) and run at 0.1 mL/min.

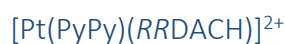

# Elemental Composition Report

Page 1

## Multiple Mass Analysis: 2 mass(es) processed

Tolerance = 20.0 PPM / DBE: min = -1.5, max = 50.0

Element prediction: Off

Number of isotope peaks used for i-FIT = 9

Monoisotopic Mass, Even Electron Ions

140 formula(e) evaluated with 2 results within limits (all results (up to 1000) for each mass)

Elements Used:

C: 0-27 H: 0-35 N: 0-5 Na: 0-1 Br: 0-1 Pt: 1-1

230403 1 32 (0.637) AM2 (Ar,20000.0,556.28,0.00,LS 3); Cm (27:41)

1: TOF MS ES+

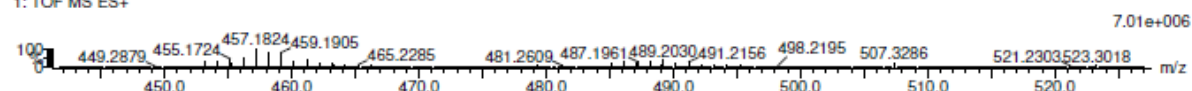

Minimum: 80.00  
Maximum: 100.00

| Mass     | RA     | Calc. Mass | mDa  | PPM   | DBE | 1-FIT  | Norm | Conf (%) | Formula          |
|----------|--------|------------|------|-------|-----|--------|------|----------|------------------|
| 457.1824 | 100.00 | 457.1907   | -8.3 | -18.2 | 2.5 | 1888.3 | n/a  | n/a      | C14 H29 N3 Na Pt |
| 459.1905 | 80.25  | 459.1836   | 6.9  | 15.0  | 5.5 | 1959.3 | n/a  | n/a      | C14 H26 N5 Pt    |

230403\_2 33 (0.674) AM2 (Ar,20000.0,556.28,0.00,LS 3); Cm (20:33)

1: TOF MS ES+  
1.21e7

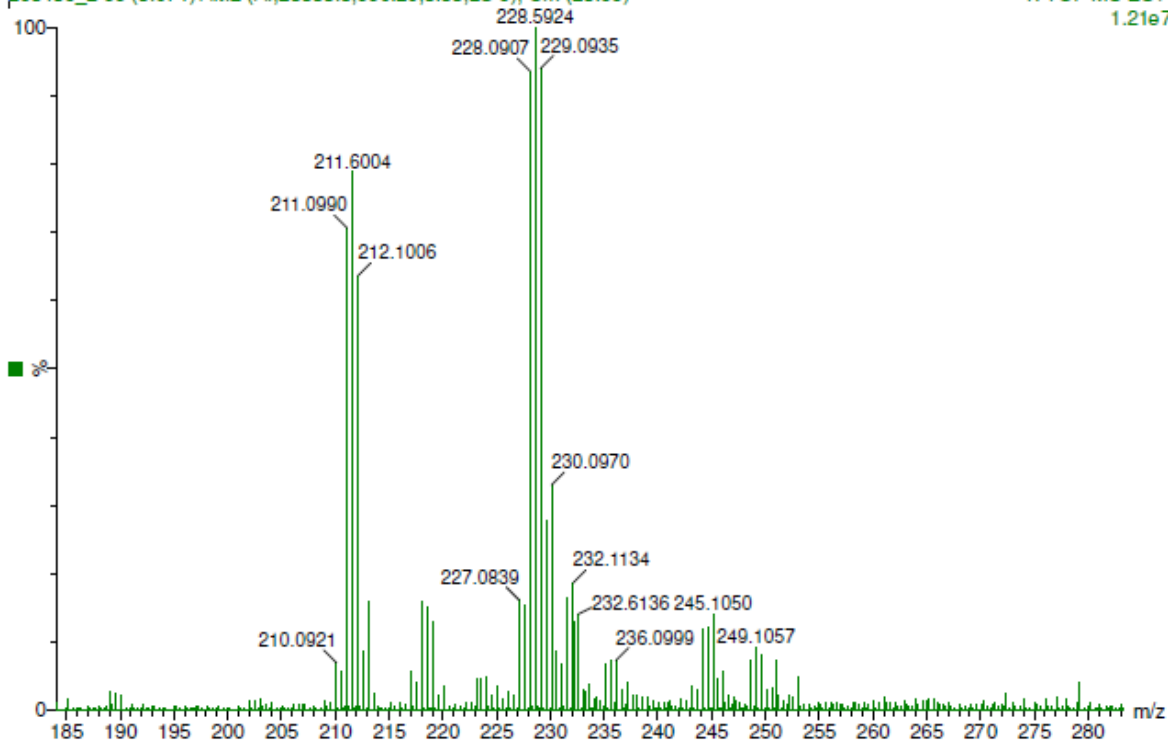

**Figure S44.** ESIMS spectrum of  $[\text{Pt}(\text{PyPy})(\text{RRDACH})]^{+2}$  measured on a Waters TQ-MS triple quadrupole mass spectrometer. Sample solutions were made up to 0.3 mM in  $\text{H}_2\text{O}$ : MeOH (90:10) and run at 0.1 mL/min.

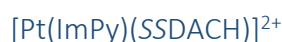

# Elemental Composition Report

Page 1

## Single Mass Analysis

Tolerance = 20.0 PPM / DBE: min = -1.5, max = 50.0

Element prediction: Off

Number of isotope peaks used for i-FIT = 9

Monoisotopic Mass, Even Electron Ions

72 formula(e) evaluated with 2 results within limits (all results (up to 1000) for each mass)

Elements Used:

C: 0-20 H: 0-30 N: 0-6 Na: 0-1 Br: 0-1 Pt: 1-1

230403\_3\_46 (0.913) AM2 (Ar,20000.0,556.28,0.00,LS 3)

1: TOF MS ES+

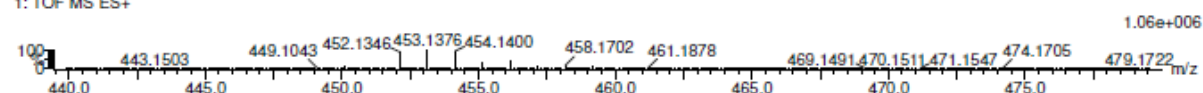

Minimum: -1.5  
Maximum: 20.0 20.0 50.0

| Mass     | Calc. Mass | mDa | PPM | DBE | 1-FIT  | Norm  | Conf(%) | Formula          |
|----------|------------|-----|-----|-----|--------|-------|---------|------------------|
| 453.1376 | 453.1366   | 1.0 | 2.2 | 8.5 | 1622.0 | 0.553 | 57.54   | C14 H20 N5 Pt    |
|          | 453.1342   | 3.4 | 7.5 | 5.5 | 1622.3 | 0.857 | 42.46   | C12 H21 N5 Na Pt |

230403\_3\_48 (0.947) AM2 (Ar,20000.0,556.28,0.00,LS 3); Cm (43:48)

1: TOF MS ES+  
5.94e6

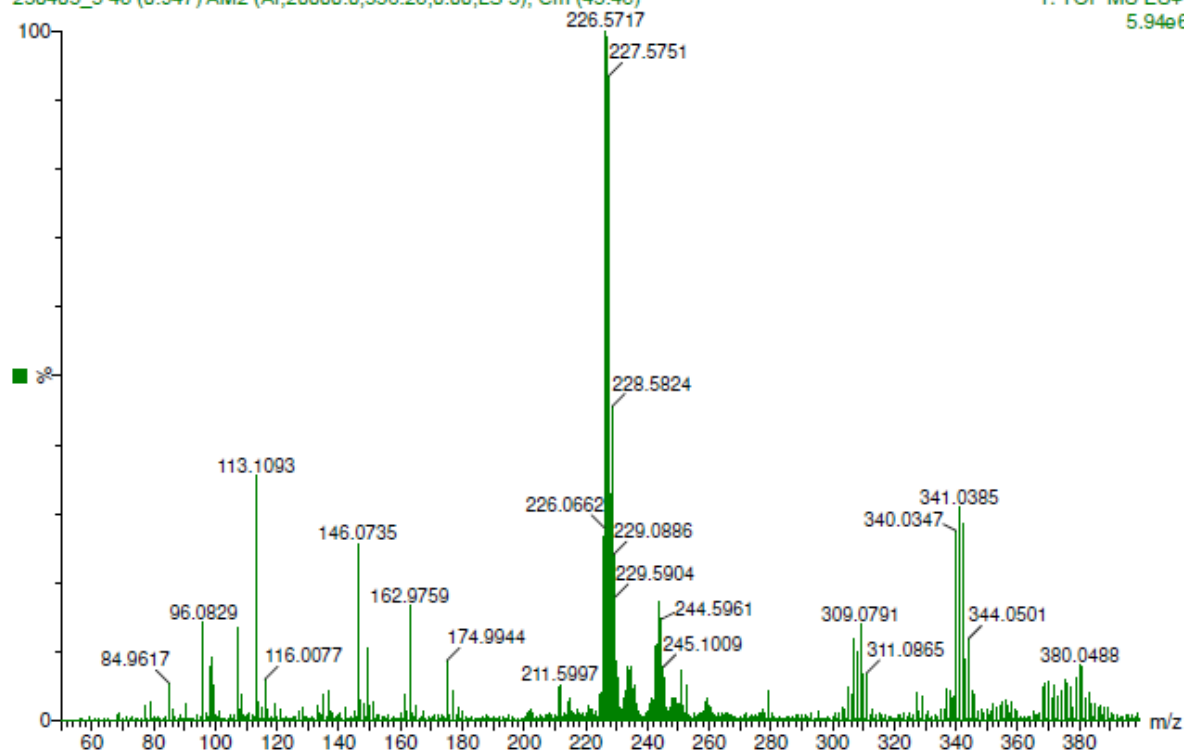

**Figure S45.** ESIMS spectrum of [Pt(ImPy)(SSDACH)]<sup>2+</sup> measured on a Waters TQ-MS triple quadrupole mass spectrometer. Sample solutions were made up to 0.3 mM in H<sub>2</sub>O: MeOH (90:10) and run at 0.1 mL/min.

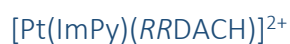

## Elemental Composition Report

Page 1

### Single Mass Analysis

Tolerance = 20.0 PPM / DBE: min = -1.5, max = 50.0

Element prediction: Off

Monoisotopic Mass, Even Electron Ions

72 formula(e) evaluated with 2 results within limits (all results (up to 1000) for each mass)

Elements Used:

C: 0-20 H: 0-30 N: 0-6 Na: 0-1 Br: 0-1 Pt: 1-1

230403\_4 41 (0.829) Cm (41:46)

1: TOF MS ES+

3.27e+006

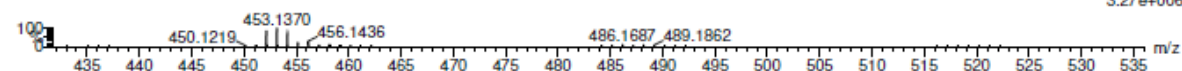

Minimum: -1.5  
Maximum: 20.0 20.0 50.0

| Mass     | Calc. Mass | mDa | PPM | DBE | Formula          |
|----------|------------|-----|-----|-----|------------------|
| 453.1370 | 453.1366   | 0.4 | 0.9 | 8.5 | C14 H20 N5 Pt    |
|          | 453.1342   | 2.8 | 6.2 | 5.5 | C12 H21 N5 Na Pt |

230403\_4 41 (0.829) Cm (41:46)

1: TOF MS ES+  
3.43e6

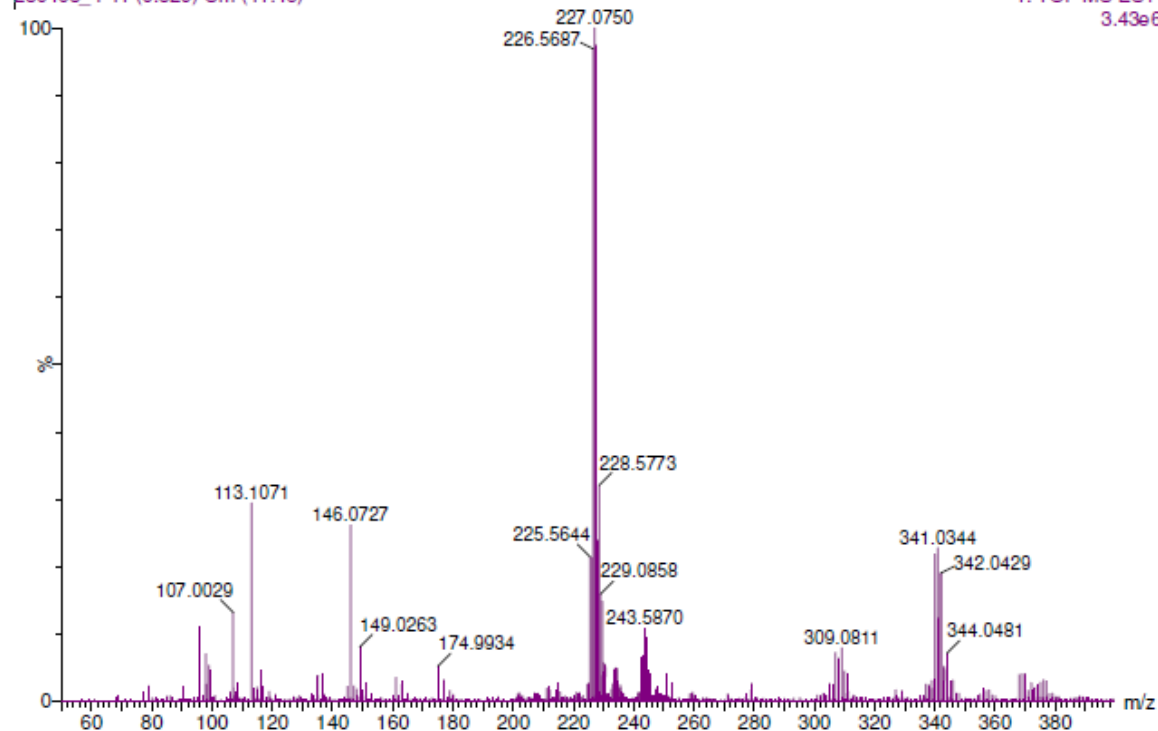

**Figure S46.** ESIMS spectrum of  $[\text{Pt}(\text{ImPy})(\text{RRDACH})]^{2+}$  measured on a Waters TQ-MS triple quadrupole mass spectrometer. Sample solutions were made up to 0.3 mM in  $\text{H}_2\text{O}$ : MeOH (90:10) and run at 0.1 mL/min.



# Elemental Composition Report

Page 1

## Single Mass Analysis

Tolerance = 20.0 PPM / DBE: min = -1.5, max = 50.0

Element prediction: Off

Number of isotope peaks used for i-FIT = 9

Monoisotopic Mass, Even Electron Ions

72 formula(e) evaluated with 2 results within limits (all results (up to 1000) for each mass)

Elements Used:

C: 0-20 H: 0-30 N: 0-6 Na: 0-1 Br: 0-1 Pt: 1-1

230403 3 46 (0.913) AM2 (Ar,20000.0,556.28,0.00,LS 3)

1: TOF MS ES+

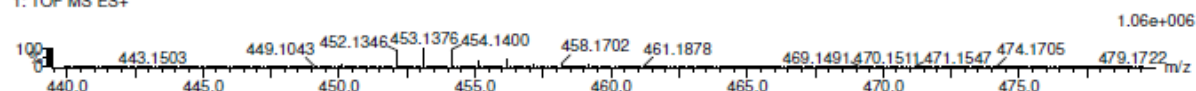

Minimum: -1.5  
Maximum: 20.0 20.0 50.0

| Mass     | Calc. Mass | mDa | PPM | DBE | 1-FIT  | Norm  | Conf(%) | Formula          |
|----------|------------|-----|-----|-----|--------|-------|---------|------------------|
| 453.1376 | 453.1366   | 1.0 | 2.2 | 8.5 | 1622.0 | 0.553 | 57.54   | C14 H20 N5 Pt    |
|          | 453.1342   | 3.4 | 7.5 | 5.5 | 1622.3 | 0.857 | 42.46   | C12 H21 N5 Na Pt |

230403\_5 42 (0.846) Cm (42:46)

1: TOF MS ES+  
4.30e6

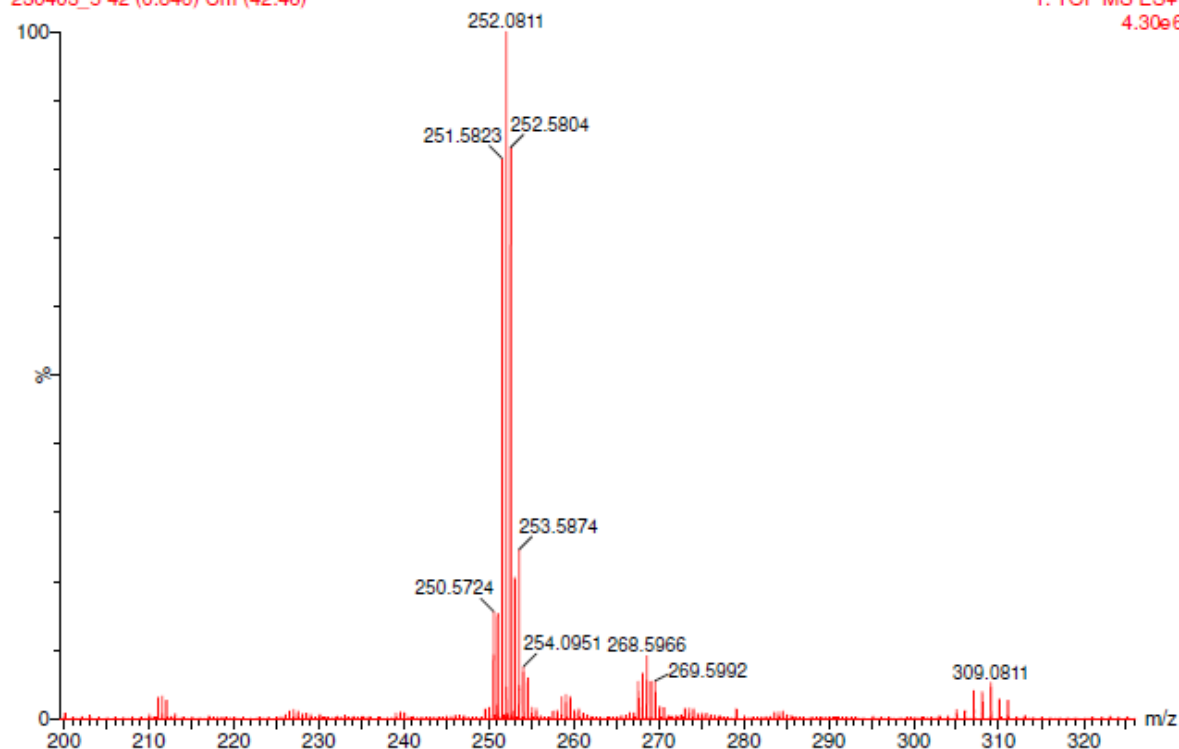

**Figure S47.** ESIMS spectrum of  $[\text{Pt}(\text{BImPy})(\text{SSDACH})]^{2+}$  measured on a Waters TQ-MS triple quadrupole mass spectrometer. Sample solutions were made up to 0.3 mM in  $\text{H}_2\text{O}$ : MeOH (90:10) and run at 0.1 mL/min.

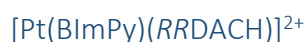

# Elemental Composition Report

Page 1

## Multiple Mass Analysis: 3 mass(es) processed

Tolerance = 20.0 PPM / DBE: min = -1.5, max = 50.0

Element prediction: Off

Number of isotope peaks used for i-FIT = 9

Monoisotopic Mass, Even Electron Ions

178 formula(e) evaluated with 6 results within limits (all results (up to 1000) for each mass)

Elements Used:

C: 0-20 H: 0-30 N: 0-6 Na: 0-1 Br: 0-1 Pt: 1-1

230403\_6 17 (0.364) AM2 (Ar,20000.0,0.00,0.00); Cm (16:27)

1: TOF MS ES+

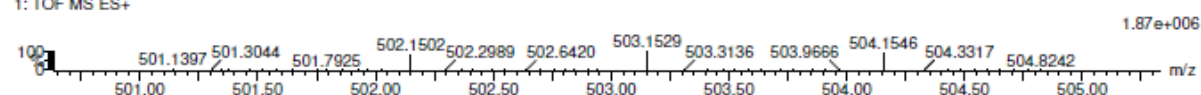

Minimum: 80.00  
Maximum: 100.00

| Mass     | RA     | Calc. Mass | mDa  | PPM   | DBE  | 1-FIT | Norm  | Conf(%) | Formula          |
|----------|--------|------------|------|-------|------|-------|-------|---------|------------------|
| 502.1502 | 82.05  | 502.1546   | -4.4 | -8.8  | 8.5  | 611.4 | 0.585 | 55.73   | C17 H24 N4 Na Pt |
|          |        | 502.1570   | -6.8 | -13.5 | 11.5 | 611.6 | 0.815 | 44.27   | C19 H23 N4 Pt    |
| 503.1529 | 100.00 | 503.1523   | 0.6  | 1.2   | 11.5 | 403.7 | 0.537 | 58.47   | C18 H22 N5 Pt    |
|          |        | 503.1499   | 3.0  | 6.0   | 8.5  | 404.1 | 0.879 | 41.53   | C16 H23 N5 Na Pt |
| 504.1546 | 90.01  | 504.1475   | 7.1  | 14.1  | 11.5 | 200.0 | 0.687 | 50.31   | C17 H21 N6 Pt    |
|          |        | 504.1451   | 9.5  | 18.8  | 8.5  | 200.0 | 0.699 | 49.69   | C15 H22 N6 Na Pt |

230403\_6 17 (0.364) AM2 (Ar,20000.0,0.00,0.00); Cm (16:27)

1: TOF MS ES+  
6.18e6

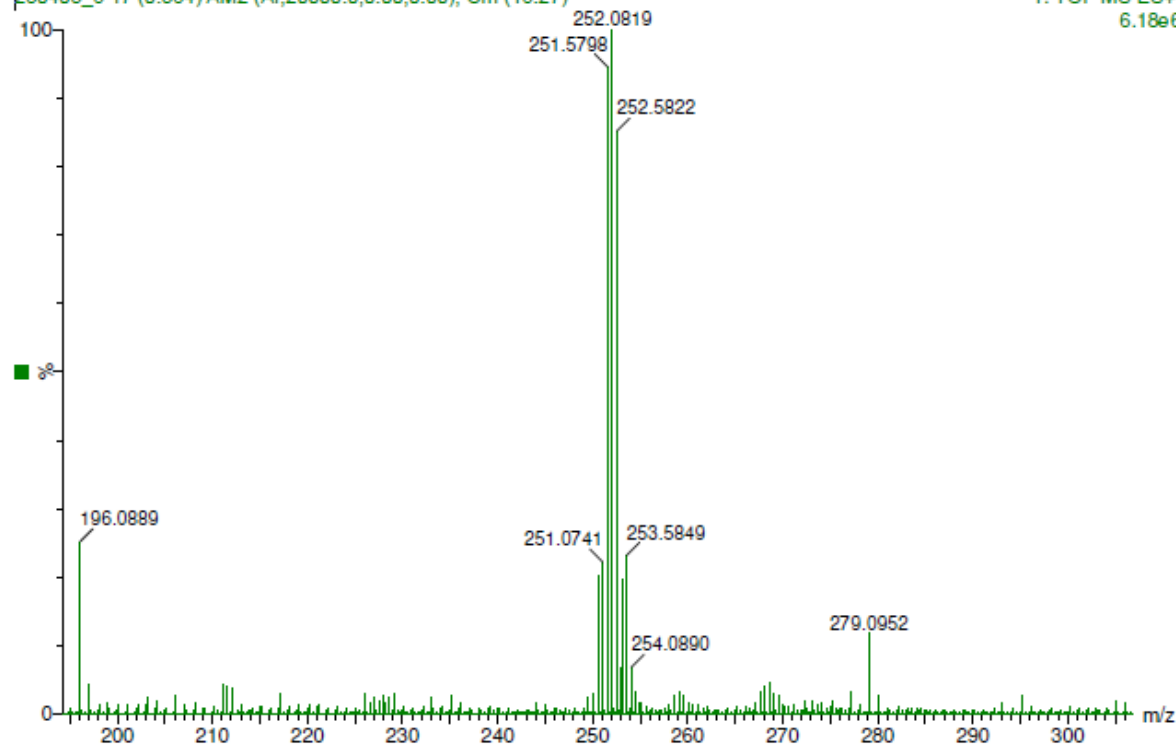

**Figure S48.** ESIMS spectrum of [Pt(BImPy)(RRDACH)]<sup>2+</sup> measured on a Waters TQ-MS triple quadrupole mass spectrometer. Sample solutions were made up to 0.3 mM in H<sub>2</sub>O: MeOH (90:10) and run at 0.1 mL/min.



## Lipophilicity

Figure S49 illustrates the linear plots of  $\log K'$  against % ACN including the resulting equation. These experiments were undertaken on an Agilent Technologies 1260 Infinity machine equipped with a Phenomenex Onyx™ Monolithic C18 reverse phase column (100 × 4.6 mm, 130 Å). The mobile phase comprised of 0.06% TFA in water (solvent A) and 0.06% TFA in ACN.H<sub>2</sub>O (90 : 10, solvent B). The dead time was determined using potassium iodide as an external dead volume marker.

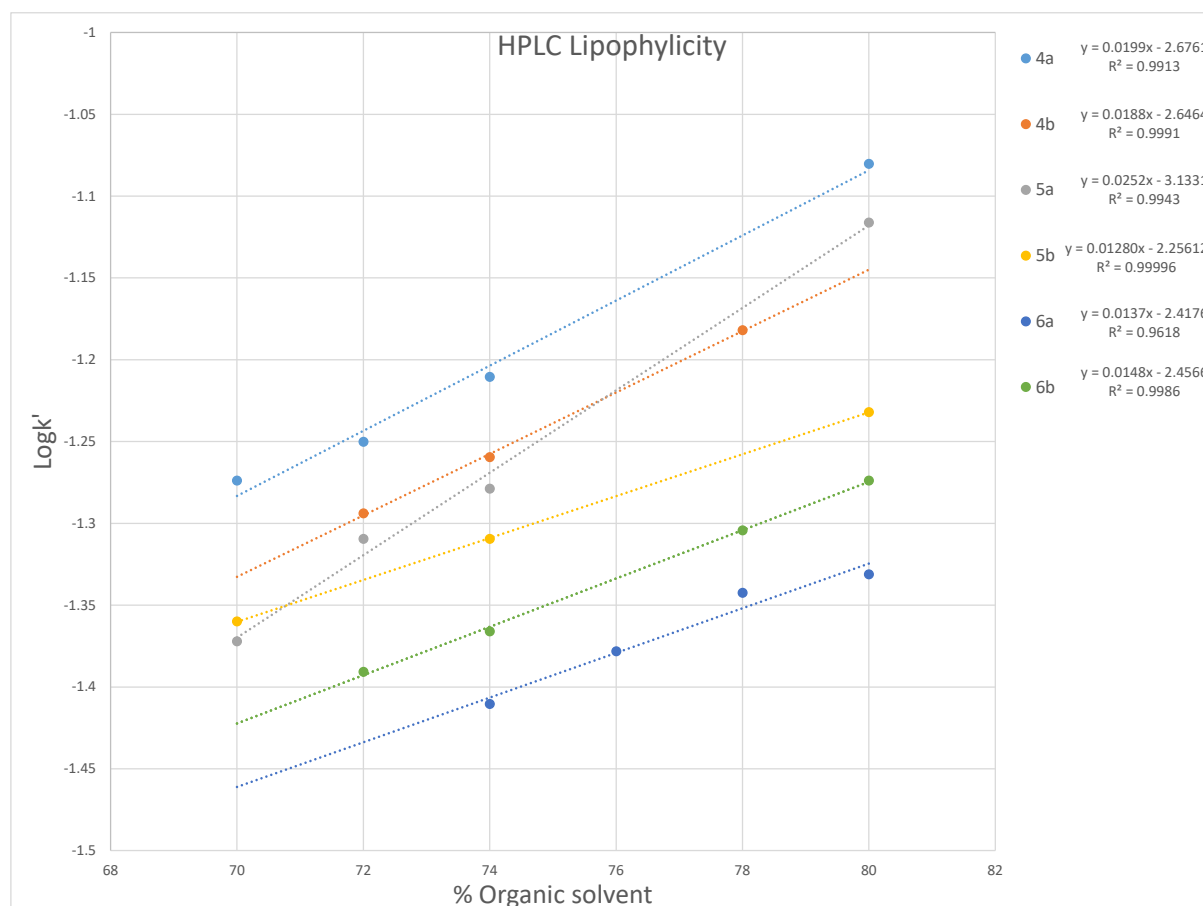

**Figure S49.**  $\log K'$  plotted against % ACN in the mobile phase.

## References

1. Klose, M.H.M.; Theiner, S.; Varbanov, H.P.; Hoefer, D.; Pichler, V.; Galanski, M.; Meier-Menches, S.M.; Keppler, B.K. Development and Validation of Liquid Chromatography-Based Methods to Assess the Lipophilicity of Cytotoxic Platinum(IV) Complexes. *Inorganics* **2018**, *6*, 130 doi:10.3390/inorganics6040130.
2. Reithofer, M.R.; Bytzek, A.K.; Valiahdi, S.M.; Kowol, C.R.; Groessl, M.; Hartinger, C.G.; Jakupec, M.A.; Galanski, M.; Keppler, B.K. Tuning of Lipophilicity and Cytotoxic Potency by Structural Variation of Anticancer Platinum(IV) Complexes. *J. Inorg. Biochem.* **2011**, *105*, 46–51, doi:10.1016/j.jinorgbio.2010.09.006.
3. Valkó, K. Application of High-Performance Liquid Chromatography Based Measurements of Lipophilicity to Model Biological Distribution. *J. Chromatogr. A* **2004**, *1037*, 299–310, doi:10.1016/j.chroma.2003.10.084.
